RESEARCH ARTICLE

# A Novel Approach for Dynamic Testing of Total Hip Dislocation under Physiological Conditions

Sven Herrmann<sup>1</sup>, Daniel Kluess<sup>1</sup>, Michael Kaehler<sup>2</sup>, Robert Grawe<sup>2</sup>, Roman Rachholz<sup>2</sup>, Robert Souffrant<sup>1</sup>, János Zierath<sup>2</sup>, Rainer Bader<sup>1</sup>, Christoph Woernle<sup>2\*</sup>

**1** Department of Orthopaedics, University Medicine Rostock, Rostock, Germany, **2** Chair of Technical Dynamics, Faculty of Mechanical Engineering and Marine Technology, University of Rostock, Rostock, Germany

\* [woernle@uni-rostock.de](mailto:woernle@uni-rostock.de)

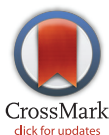

**OPEN ACCESS**

**Citation:** Herrmann S, Kluess D, Kaehler M, Grawe R, Rachholz R, Souffrant R, et al. (2015) A Novel Approach for Dynamic Testing of Total Hip Dislocation under Physiological Conditions. PLoS ONE 10(12): e0145798. doi:10.1371/journal.pone.0145798

**Editor:** M. A. Pérez, University of Zaragoza, SPAIN

**Received:** May 27, 2015

**Accepted:** December 8, 2015

**Published:** December 30, 2015

**Copyright:** © 2015 Herrmann et al. This is an open access article distributed under the terms of the [Creative Commons Attribution License](http://creativecommons.org/licenses/by/4.0/), which permits unrestricted use, distribution, and reproduction in any medium, provided the original author and source are credited.

**Data Availability Statement:** All relevant data are within the paper.

**Funding:** This work was supported by Deutsche Forschungsgemeinschaft (<http://www.dfg.de/>), Grant numbers WO 452/8-1, WO 452/8-2 for CW and BA 3347/3-1, BA 3347/3-2 for RB. The funders had no role in study design, data collection and analysis, decision to publish, or preparation of the manuscript.

**Competing Interests:** The authors have declared that no competing interests exist.

## Abstract

Constant high rates of dislocation-related complications of total hip replacements (THR) show that contributing factors like implant position and design, soft tissue condition and dynamics of physiological motions have not yet been fully understood. As in vivo measurements of excessive motions are not possible due to ethical objections, a comprehensive approach is proposed which is capable of testing THR stability under dynamic, reproducible and physiological conditions. The approach is based on a hardware-in-the-loop (HiL) simulation where a robotic physical setup interacts with a computational musculoskeletal model based on inverse dynamics. A major objective of this work was the validation of the HiL test system against in vivo data derived from patients with instrumented THRs. Moreover, the impact of certain test conditions, such as joint lubrication, implant position, load level in terms of body mass and removal of muscle structures, was evaluated within several HiL simulations. The outcomes for a normal sitting down and standing up maneuver revealed good agreement in trend and magnitude compared with in vivo measured hip joint forces. For a deep maneuver with femoral adduction, lubrication was shown to cause less friction torques than under dry conditions. Similarly, it could be demonstrated that less cup anteversion and inclination lead to earlier impingement in flexion motion including pelvic tilt for selected combinations of cup and stem positions. Reducing body mass did not influence impingement-free range of motion and dislocation behavior; however, higher resisting torques were observed under higher loads. Muscle removal emulating a posterior surgical approach indicated alterations in THR loading and the instability process in contrast to a reference case with intact musculature. Based on the presented data, it can be concluded that the HiL test system is able to reproduce comparable joint dynamics as present in THR patients.

## Introduction

Postoperative stability of total hip replacements (THRs) constitutes an essential objective to restore mobility and relieve pain for affected patients. Dislocation, however, remains a serious complication after total hip arthroplasty frequently leading to revision surgery. For example, 26% of all total hip revisions registered during a ten-year observation period in Sweden [1] were correlated to dislocation. Another study conducted in the United States [2] ranked dislocation even before aseptic loosening as major reason for revisions, with approximately 22% of 50,000 revision cases reported.

According to previous studies there are two plausible mechanisms for total hip dislocation. On the one hand, impingement events may occur with contact between implant components, leading to leverage of the femoral head. This component-to-component impingement determines the technical range of motion (RoM) of THRs for given design and positioning parameters, i.e. head size [3, 4], head-neck ratio [5], neck-to-shaft angle of the stem [6, 7], cup orientation [5, 8–10], and stem antetorsion [9]. Studies based on mechanical setups [11–13] or finite element models [4, 14, 15] analyzed THR stability under idealized load conditions. Their outcomes revealed that additional angular motion is required beyond the instant of first impingement before frank dislocation occurs. During this subluxation process the femoral head is levered out which is characterized by a resisting torque rising due to two contact points and dropping towards dislocation.

On the other hand, dynamic forces may separate the joint conjunction without previous impingement [15, 16]. Higa et al. [17] indicated spontaneous dislocation under passive conditions to occur at cup anteversion angles above 10° for high flexion movements combined with adduction and internal rotation. Other researchers introduced realistic motion data and compliant hip joint forces derived from a validated musculoskeletal model to simulate instability scenarios addressing both dislocation mechanisms [18]. Based on this approach, Pedersen et al. [19] illuminated Lewinnek et al.'s safe zone for cup placement [20] in view of activity dependent load cases. Comparable studies revealed declined dislocation resistance for increased lip radii of the liner owing to decreased head coverage [21] and elevated risk for obesity patients due to thigh-to-thigh contact induced spontaneous separation [22].

These findings suggest that the actual load situation plays a key role in the process of THR instability besides mere kinematic considerations. In the light of musculoskeletal dynamics, Heller et al. [23] revealed that muscle and hip joint loading may substantially change due to modification of the stem antetorsion. Similar results were reported by varying stem antetorsion as well as design parameters of the femoral component which also alter the location of the hip joint center with respect to the femoral bone [24–26]. Motivated by clinical investigations [27–29], researchers [30, 31] evaluated the effect of reattached muscular and capsular structures with respect to dislocation by using full-leg specimens. Their outcomes indicated enlarged resistance under repair. Likewise, Elkins et al. [32] exposed a dramatic loss in the resisting torque from an intact or well-repaired to a defected capsule for a sit-to-stand maneuver.

Despite such insights, there is still little evidence in how exactly active and passive soft tissue structures engage during total hip dislocation in patients. This is especially the case when implant design and positioning change the geometric proportions of the skeletal system and hence overall musculoskeletal dynamics. All studies and approaches quoted entail certain shortcomings, such that reliable and reproducible analyses are scarce meeting the requirements mentioned. Loading and motion were investigated for routine activities using instrumented implants [33], but in vivo testing of excessive load cases are ethically not possible.

Therefore, the purpose of this work was to present a comprehensive approach capable of reproducible testing of THR dislocation under dynamic and physiological conditions. The

approach is based on a hardware-in-the-loop (HiL) simulation where a six-axis robot moves and loads a THR while bidirectionally interacting with a computational musculoskeletal model [34, 35]. Functionality of the physical setup [11, 34] and appropriate control modes for use in HiL simulations [36–38] were verified previously. Therefore, a major objective of the present work was to assess the HiL test system's capability of delivering physiologically realistic test conditions. Another objective was to evaluate the impact of certain test conditions on the stability of the artificial hip joint for a representative dislocation-associated leg maneuver. These included joint lubrication, implant position, subject body mass, and removal of muscle structures emulating a posterior surgical approach.

## Methods

The HiL approach is first introduced by means of a functional principle. It describes the underlying interactions between the two integral components: the physical setup and the computational musculoskeletal model, both embedded into a control system. The real implant components are attached to the physical setup composed of a compliant support and an industrial robot running in hybrid position-force control. The model calculates muscle and reaction forces following inverse dynamics while incorporating implant design and positioning parameters. Required motion data is obtained by motion analyses with subsequent inverse kinematics of one healthy subject for two maneuvers. Based on the motion data, both model and physical setup were configured according to certain model and test parameters for carrying out several HiL simulations for the purposes of validation and parameter variation.

### Functional principle of HiL simulations for testing THR

The functional principle of the HiL approach is based on complementary sets of free and constrained directions of the artificial joint [36, 38]. The motion of the femoral head relative to the acetabular cup is constrained in translational directions due to the contact between the joint surfaces. On the contrary, relative movements in rotational directions are free within the technical RoM. Given these joint characteristics, an appropriate control strategy for the robot is to apply force in the constrained translational and to move the femoral stem in the free rotational directions using hybrid position-force control.

For the spatial load case (Fig 1), the free directions are specified as the rotations of the femur with respect to the pelvis with the angles  $q_1$  (adduction/abduction),  $q_2$  (internal/external rotation) and  $q_3$  (flexion/extension). At a current time instant  $t$ , the musculoskeletal model delivers values of the angles  $q_1$ ,  $q_2$  and  $q_3$  which are transferred to the robot controller. Accordingly, the femoral component of the THR is rotated in the position with angles  $\bar{q}_1$ ,  $\bar{q}_2$  and  $\bar{q}_3$  by the robot under position control. The transferred values denoted by bars normally differ from the original values without bars due to signal delays and the limited dynamic bandwidth of the controlled robot. Resisting torque components  $\tau_1^f$ ,  $\tau_2^f$ ,  $\tau_3^f$  usually due to friction, are measured along the coordinates  $\bar{q}_1$ ,  $\bar{q}_2$  and  $\bar{q}_3$  as a consequence of the movement, and fed back to the model closing the first control loop of the HiL simulation.

The second control loop is given by considering the three translations treated as constrained directions. At the same time instant  $t$ , the corresponding components of the reaction forces  $f_1^r$ ,  $f_2^r$ ,  $f_3^r$  are calculated by the model which mainly depend on active muscle forces  $f^m$ , gravitational and dynamic forces. After transmission to the robot controller, the robot applies the reaction force components  $\bar{f}_1^r$ ,  $\bar{f}_2^r$ ,  $\bar{f}_3^r$  onto the THR using force control. As long as the THR bears the applied forces, only minor relative displacements of the implant components  $c_1$ ,  $c_2$ ,  $c_3$  are recorded between the femoral head and the cup. Separation of the joint partners and hence instability is indicated by increasing relative displacements  $c_1$ ,  $c_2$ ,  $c_3$ . This is also accompanied

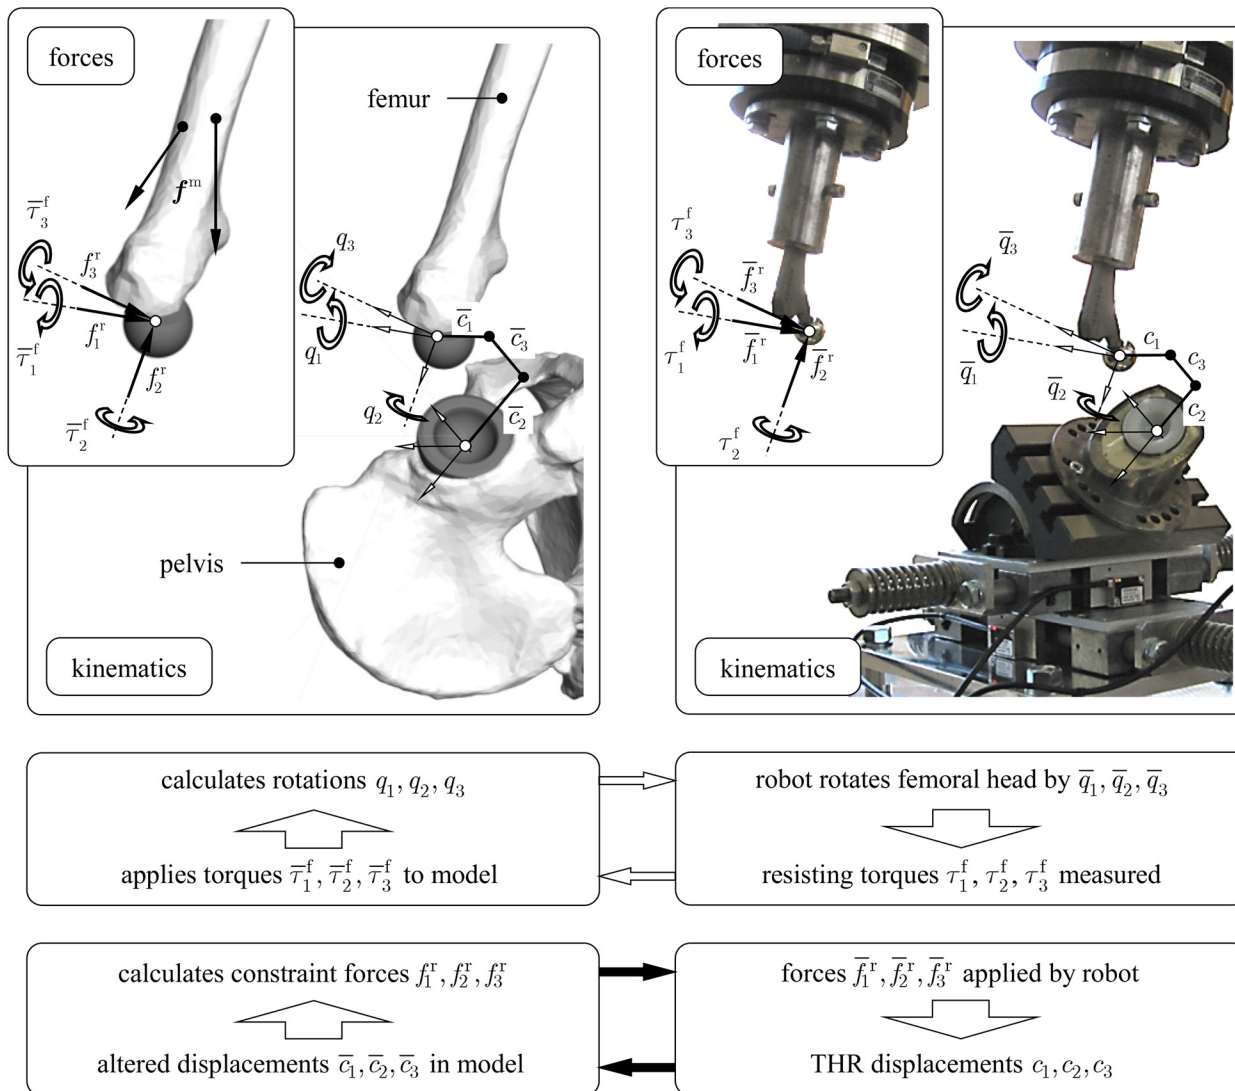

**Fig 1. Functional principle of the HIL simulation for testing THR with respect to dislocation.** The transfer between the musculoskeletal model and the physical setup is illustrated within the two control loops on kinematic and force level, respectively. The THR components are attached to mounting devices which are fixed to the endeffector of the robot (stem) and the compliant support (cup).

doi:10.1371/journal.pone.0145798.g001

by rising values of the measured resisting torques  $\tau_1^f, \tau_2^f, \tau_3^f$  in case of impingement [13, 14]. The resisting torques  $\tau_1^f, \tau_2^f, \tau_3^f$  as well as the displacements  $c_1, c_2, c_3$  transferred into the model have an impact on soft tissue elongation and muscle force calculation in the next time instant.

### Physical setup and control

The physical setup consists of a six-axis industrial robot (TX200, Stäubli Tec-Systems GmbH, Bayreuth, Germany) equipped with a six degree-of-freedom force-torque sensor (Omega 160, ATI Industrial Automation, Apex, North Carolina, USA) and a compliant support mounted on a ground-fixed framework (Fig 2) [37, 38]. The support consists of three serially arranged prismatic joints with orthogonal axes. Springs restrain the displacements along these axes

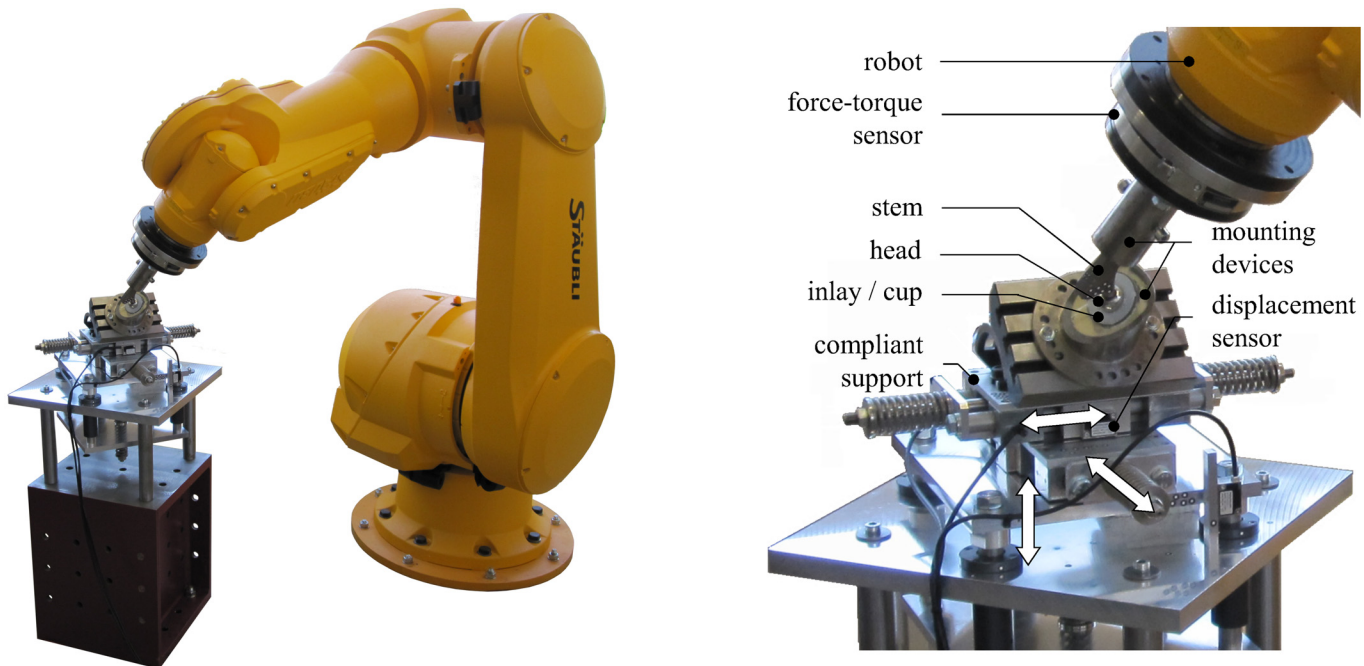

**Fig 2. Physical setup of the HiL test system for testing THR.** The THR components are fixed on mounting devices attached to the endeffector and the compliant support, respectively. Measurements are taken via the force-torque sensor and displacement sensors.

doi:10.1371/journal.pone.0145798.g002

providing elastic compliance in the three translational directions which are recorded by displacement sensors (MSK 5000, SIKO, Buchenbach, Germany).

Within this work, a standard femoral stem (SL-Plus, size 6, cone 12/14, CCD angle 131°, Smith & Nephew Orthopaedics AG, Baar, Switzerland) with a metallic head (size 28/M) was fixed with polyurethane casting resin into the mounting device attached to the endeffector of the robot. Likewise, an acetabular cup (Alloclassic CSF, size 52, with a polyethylene inlay, size 52/58, Zimmer GmbH, Freiburg, Germany) was mounted on the compliant support. Relative displacements between the femoral head and the cup are obtained by subtracting the data recorded by the displacement sensors from the position of the endeffector indicated by the robot controller.

Under high loads, displacement deviations due to small elastic deformation of the femoral component may occur. These are diminished by an error model implemented into the control program. The error model was calibrated by using a contactless stereo camera system (PONTOS, GOM mbH, Braunschweig, Germany) that measures the spatial positions of the implant components with an accuracy of about 0.01 mm.

To move and load a THR according to its free and constrained directions, the robot runs in hybrid position-force control. Position control is achieved by the robot controller (CS8C HP, Stäubli Tec-Systems GmbH, Bayreuth, Germany) running with a control cycle of 8 ms. Outer force regulating control loops are used for force control generating the control input for the inner position and velocity controllers. This means that the robot moves in the constrained directions until the forces, applied onto the compliant support and measured by the force-torque sensor, coincide with the corresponding desired value [39]. Moreover, torques occurring along the free directions are measured by the force-torque sensor.

During HiL simulations the physical setup and the musculoskeletal model are embedded into a control system [34, 38] which enables the information transfer between all components



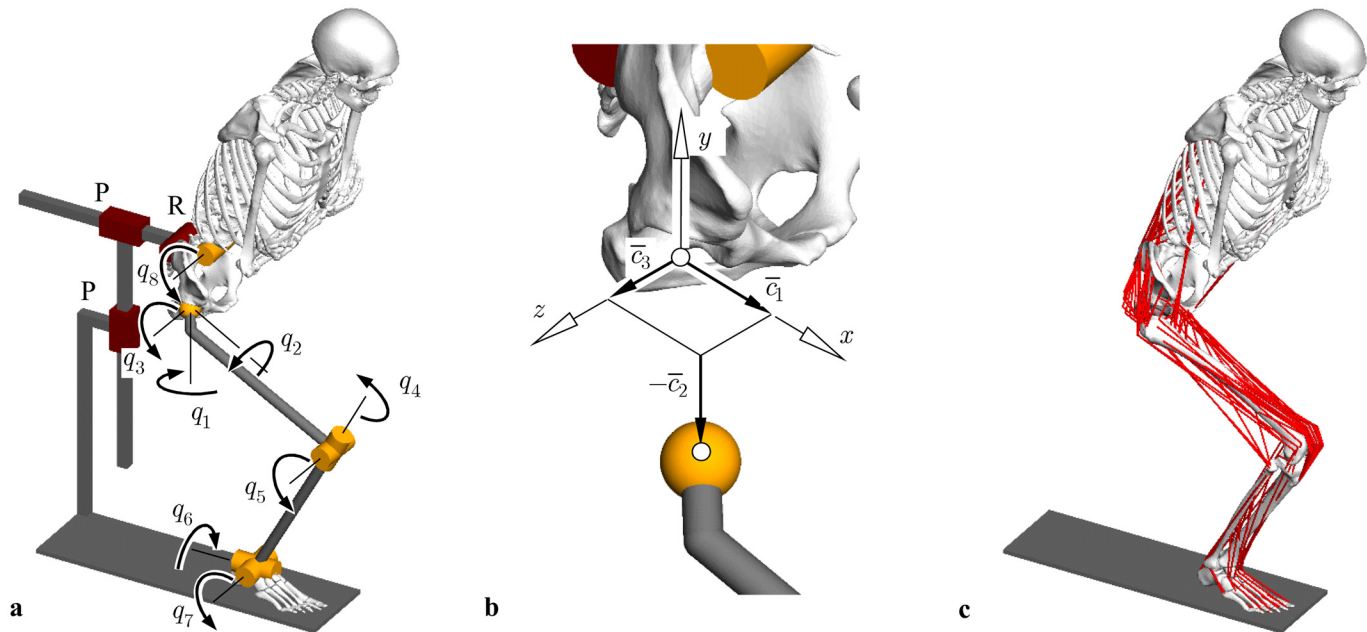

**Fig 3. Multibody system of the lower extremity for testing THR.** (a) Multibody topology with illustration of the joint coordinates and the fictive planar joint in the sagittal plane indicated as one revolute (R) and two prismatic (P) joints. (b) Measured and transferred coordinates  $\bar{c}_1$ ,  $\bar{c}_2$ ,  $\bar{c}_3$  in constrained directions of the THR. (c) Musculoskeletal model with implanted CAD geometries of the THR.

doi:10.1371/journal.pone.0145798.g003

involved. Within the control system, the robot, the sensors and the model communicate in the same time frame based on the control cycle of the robot controller. The step size of the solver in the model corresponds to the control cycle or a fraction of it. All information are exchanged between model and robot before the beginning of a new time step. The robot receives the desired values from the last computational step of the model and sends current measurements. During computation of the next time step, the robot moves and loads the attached implant components according to the desired values received.

### Musculoskeletal model for THR testing

During a HiL simulation, the musculoskeletal model calculates the reaction forces in the artificial joint for a given human motion based on an inverse dynamics approach. It also has to account for the soft tissue response during an instability event. Hence, capsular, ligament and muscle structures and their respective forces have to be incorporated into the model as well as geometric proportions and inertial properties of the skeletal system.

**Model topology and coordinates.** The musculoskeletal model consists of a multibody system with overall four moving segments modeled as rigid bodies (Fig 3a). The kinematic chain starts at the right foot assumed to be ground-fixed and continues with the tibia and fibula summarized as one segment, the femur, the pelvis and the upper body which includes the head, the torso and the upper extremities [40]. Both ankle and knee joint are modeled as universal joints with two rotational degrees of freedom each [41, 42]. The upper body is attached to the pelvis at the sacrum endplate center by a revolute joint. A kinematic subchain represents the hip joint consisting of three orthogonal prismatic joints and three revolute joints with co-intersecting axes [38]. The three coordinates of the prismatic joints are constrained by the measurements  $\bar{c}$  which are transferred from the robot to the model (Fig 3b). The three revolute joints

correspond to the free rotations defined by the Cardan angles  $q_1, q_2$  and  $q_3$ . Moreover, the kinematic chain is closed [43] by means of a fictive planar joint consisting of one revolute (R) and two prismatic (P) joints. It is established in the sagittal plane and connects the pelvis with the ground. The three constraint reactions of the planar joint represent the reactions between the modeled right lower extremity and its left counterpart under the assumption of movements being symmetrical with respect to the sagittal plane with both feet attached to the ground.

The motion of the kinematic chain can be described by the joint coordinates  $\mathbf{q} = [q_1 \dots q_8]^T$  and the measured displacements  $\bar{\mathbf{c}} = [\bar{c}_1 \ \bar{c}_2 \ \bar{c}_3]^T$ . The joint coordinates  $\mathbf{q}$  are constrained by three implicit loop closure constraints representing the symmetry conditions with respect to the sagittal plane. The constraints read at the position and velocity levels, respectively,

$$\mathbf{g}(\mathbf{q}, \bar{\mathbf{c}}) = \mathbf{0}, \tag{1}$$

$$\dot{\mathbf{g}} \equiv \mathbf{G}(\mathbf{q}, \bar{\mathbf{c}}) \dot{\mathbf{q}} = \mathbf{0} \quad \text{with} \quad \mathbf{G} = \frac{\partial \mathbf{g}}{\partial \mathbf{q}}. \tag{2}$$

The constraints Eq (1) also depend on the measured displacements  $\bar{\mathbf{c}}$  in the constrained directions of the hip joint, see Fig 1. In Eq (2) their time derivative  $\dot{\bar{\mathbf{c}}}$  is neglected as the dynamics of the measured displacements  $\bar{\mathbf{c}}$  during the HiL simulation is not physically based but governed by the force controller of the robot. This assumption is considered to be acceptable as long as the displacements  $\bar{\mathbf{c}}$  are small.

**Equations of motion.** The equations of motion of the model are formulated in terms of the joint coordinates  $\mathbf{q}$  and the measured displacements  $\bar{\mathbf{c}}$ ,

$$\mathbf{M}(\mathbf{q}, \bar{\mathbf{c}}) \ddot{\mathbf{q}} = \boldsymbol{\tau}^c(\mathbf{q}, \dot{\mathbf{q}}, \bar{\mathbf{c}}) + \boldsymbol{\tau}^p(\mathbf{q}, \dot{\mathbf{q}}, \bar{\mathbf{c}}) + \bar{\boldsymbol{\tau}}^f + \boldsymbol{\tau}^m(\mathbf{q}, \bar{\mathbf{c}}, \boldsymbol{\alpha}) + \boldsymbol{\tau}^r. \tag{3}$$

The (8, 8) mass matrix  $\mathbf{M}$  is obtained under the assumption that the soft tissue masses are added to the masses of the corresponding skeletal segments. Dynamic wobbling of the muscle masses is neglected. The vector  $\boldsymbol{\tau}^c$  contains the torques of the centrifugal, gravity and contact forces with respect to the joint axes,  $\boldsymbol{\tau}^p$  are the joint torques due to passive soft tissue structures such as the hip capsule,  $\bar{\boldsymbol{\tau}}^f$  are the measured resisting torques fed back from the robot into the model according to Fig (1), and  $\boldsymbol{\tau}^m$  are the joint torques from the active muscle forces depending on muscle activation levels  $\boldsymbol{\alpha}$ . The vector  $\boldsymbol{\tau}^r$  includes the joint torques due to the constraint forces at the cut planar joint that are expressed by means of the (3, 8) Jacobian matrix  $\mathbf{G}$  from Eq (2) and the vector  $\boldsymbol{\lambda} = [\lambda_1 \ \lambda_2 \ \lambda_3]^T$  with the constraint force coordinates (Lagrange multipliers) of the planar joint,

$$\boldsymbol{\tau}^r = \mathbf{G}^T(\mathbf{q}, \bar{\mathbf{c}}) \boldsymbol{\lambda}. \tag{4}$$

**Inverse dynamics.** The equations of motion Eq (3) are used to calculate the muscle forces and the hip joint reaction force for given motion  $\mathbf{q}(t)$  according to an inverse dynamics approach. Here, two sources of redundancy occur in the musculoskeletal system. The first redundancy is due to the closed kinematic chain of the model representing human motions with both feet attached to the ground [43]. This means physically that the musculoskeletal system can be internally loaded by active muscle forces without generating motion. The second redundancy is due to the distribution problem of muscle forces as generally more muscle structures are available than required to produce muscle torques for a specific motor task [44, 45].

For a given motion  $\mathbf{q}(t)$  and its time derivatives satisfying the loop closure constraints Eq (1) and their time derivatives, the first redundancy problem is addressed by evaluating the equations of motion Eq (3) with respect to the eight muscle torques  $\boldsymbol{\tau}^m$  and the three constraint force coordinates  $\boldsymbol{\lambda}$ . The actual displacements in the constrained directions  $\bar{\mathbf{c}}$  are known from

the measurements at the physical setup. This leads to an under-determined linear system of eight equations in altogether eleven unknowns  $\boldsymbol{\tau}^m$  and  $\boldsymbol{\lambda}$ ,

$$[I \quad G^T] \begin{bmatrix} \boldsymbol{\tau}^m \\ \boldsymbol{\lambda} \end{bmatrix} = \mathbf{b} \quad \text{with} \quad \mathbf{b} = M\ddot{\mathbf{q}} - \boldsymbol{\tau}^c - \boldsymbol{\tau}^p - \bar{\boldsymbol{\tau}}^f \quad (5)$$

and the identity matrix  $I$ . The redundancy problem is solved by regarding Eq (5) as an equality constraint of a static optimisation problem minimising a quadratic objective function with a diagonal weighting matrix  $Q$  [46],

$$Z(\mathbf{x}) \equiv \mathbf{x}^T Q \mathbf{x} = \min_x \quad \text{with} \quad \mathbf{x} = \begin{bmatrix} \boldsymbol{\tau}^m \\ \boldsymbol{\lambda} \end{bmatrix} \quad \text{subjected to (5)}. \quad (6)$$

The second redundancy problem has to be solved for estimating  $n$  individual muscle forces from the muscle torques  $\boldsymbol{\tau}^m$ . To incorporate muscle architecture, the forces of  $n$  muscle force elements  $\mathbf{f}^m = [f_1 \dots f_n]^T$  are expressed in terms of their corresponding muscle activation levels  $\boldsymbol{\alpha} = [\alpha_1 \dots \alpha_n]^T$  which are used to scale the isometric force of each muscle [40]. Hence,

$$\mathbf{f}^m = \mathbf{B}(\mathbf{q}, \bar{\mathbf{c}}) \mathbf{C} \boldsymbol{\alpha}. \quad (7)$$

Here, the  $(n, n)$  matrix  $\mathbf{B}$  summarizes the normalized force directions of each muscle. Matrix  $\mathbf{C} = \text{diag}(C_1 \dots C_n)$  contains the isometric muscle forces obtained from the physiological muscle cross section area  $A_i$  times the physiological muscle stress  $\sigma_i$ ,

$$C_i = A_i \sigma_i, \quad i = 1, \dots, n. \quad (8)$$

With the  $(1, 8)$  Jacobian matrices  $\mathbf{J}_i^m$ , which relates the length rate of the  $i$ th muscle  $\dot{s}_i$  with the time derivatives of the joint angles  $\dot{\mathbf{q}}$ , thus  $\dot{s}_i = \mathbf{J}_i^m \dot{\mathbf{q}}$ , the contribution of the  $i$ th muscle force  $f_i^m$  to the muscle torques is described by  $\tau_i^m = \mathbf{J}_i^{mT} f_i^m$ . Together with Eq (7), the distribution problem is then formulated as an under-determined system of eight linear equations for  $n$  muscle activation levels  $\boldsymbol{\alpha}$ ,

$$\mathbf{J}^{mT}(\mathbf{q}, \bar{\mathbf{c}}) \mathbf{B}(\mathbf{q}, \bar{\mathbf{c}}) \mathbf{C} \boldsymbol{\alpha} = \boldsymbol{\tau}^m \quad \text{with} \quad \mathbf{J}^m = \begin{bmatrix} \mathbf{J}_1^m \\ \vdots \\ \mathbf{J}_n^m \end{bmatrix} \quad (9)$$

with muscle torques  $\boldsymbol{\tau}^m$  obtained from Eq (6). Again a static optimization problem is solved. Here, a quadratic cost function with a positive definite weighting matrix  $\mathbf{P}$  is considered,

$$Z_z(\mathbf{x}) \equiv \boldsymbol{\alpha}^T \mathbf{P} \boldsymbol{\alpha} = \min_z \quad \text{with} \quad \boldsymbol{\alpha} \quad \text{subjected to (9)} \quad (10)$$

and  $0 \leq \alpha_i \leq 1$  [40].

Finally, the reaction force  $\mathbf{f}^r$  at the hip joint is calculated using the laws of momentum and moment of momentum of the bodies of the kinematic chain with the reaction force coordinates obtained from Eq (6) and the muscle forces from Eq (7).

**Implementation of the musculoskeletal model.** Bone geometries were derived from a human male computed tomography dataset [47] using segmentation and reconstructing techniques [48] (Fig 3c). Reconstructed geometries were transformed into local reference frames [49–51]. Joint rotation centres were obtained by fitting spheres or cylinders into articulating surfaces of the geometries. Subsequently, the kinematic chain described above was composed in the multibody software SIMPACK (Version 8.9, Simpack AG, Gilching, Germany). The



overall segment masses  $m_i$  were formulated as functions of the subject's mass using regression equations [52] which were further differentiated into bone and soft tissue masses.

As implantation of THR components may alter the geometric proportions within the kinematic chain, CAD geometries of the acetabular cup and the femoral stem were virtually implanted into the bone structures introducing implant positioning and design parameters. The cup was placed according to radiographic angles (cup inclination  $\iota$ , cup anteversion  $\beta$ ) with respect to the pelvic reference frame [9, 53] preserving the hip joint rotation center on the pelvic side. The stem was positioned along the long axis of the proximal femur whereas the neck-shaft intersections of both implant and bone served as reference points for implant setting  $s$ . Stem antetorsion  $\vartheta$  was defined as rotation around the implant shaft axis aligned to the long axis of the proximal femur shaft. At  $\vartheta = 0^\circ$  anteversion, the implant neck axis fell into a plane spanned by the most posterior points of the two condyles and the greater trochanter. For given design parameters (CCD angle  $\nu$ , neck length  $l$ , head offset  $h$  and head diameter  $d$ ), the hip joint rotation center was defined with respect to the femoral reference frame which does not necessarily coincide with the center of the native femoral head.

Passive forces from capsule and ligament structures were neglected, i.e.  $\tau^P = \mathbf{0}$ . Active muscle forces were assumed to act along straight lines [45]. Hence, overall  $n = 70$  muscle elements were implemented according to anatomic attachment sites [54] whereas larger muscles were split into several elements. To avoid bone intrusion and intersection of joint rotation centers even for higher degrees of flexion, muscle wrapping and curvature were taken into account by using segment-fixed via-points [55]. Likewise, deflection of the quadriceps apparatus was modeled by femur-fixed via-points along the trochlear groove gained from a patella-femoral model [56]. Physiological cross section areas  $A_j$  were derived from the literature [57, 58]. Physiological muscle stresses were assumed to be  $\sigma_i = 1.0$  MPa [59] for all muscle force elements. Smooth contact [60] was implemented between the global reference frame and the tuber ischiadicum depending on seat height and body weight. Moreover, a quadratic programming algorithm [61] was implemented into the model to resolve both redundancy problems given in Eqs (6) and (10), respectively.

## Motion analyses and model parametrization

As in vivo motion data of dislocation-associated leg maneuvers were not available, motion analyses with one healthy human subject (male, 24 a, 1.81 m, 80 kg) were performed. Written informed consent was obtained from the subject. The study and the consent procedure were approved by the Local Ethics Committee of the University of Rostock (A 2010–84). The investigations were conducted according to the principles of the Declaration of Helsinki.

During the analyses, kinematic data of skin markers placed on palpable bony landmarks [62] were recorded using an ultrasound measuring system (CMS-HS Measuring System, zebris Medical GmbH, Isny im Allgäu, Germany). Two leg maneuvers were considered:

1. normal sitting down and standing up (48 cm seat height) for validation purposes
2. deep sitting down and standing up with femoral adduction (33 cm seat height) for analyzing dislocation behavior

The deep maneuver is associated with high risk of anterior impingement and posterior dislocation [18]. Both maneuvers were repeated five times. Averaged data sets were gained for each maneuver by normalizing the time scale and averaging the five motion cycles. Down sampling, spline interpolation and numerical differentiation were performed using the Curve Fitting Toolbox in MATLAB (Version 7.11, MathWorks, Ismaning, Germany) to achieve smooth kinematic data of the skin markers from the averaged data sets at the position, velocity and

**Table 1. Configurations for nine HiL simulations with varying model and test parameters.**

| no. | maneuver | lubrication | cup inclination $\iota$ | cup anteversion $\beta$ | stem antetorsion $\vartheta$ | body mass | muscle elements $n$ |
|-----|----------|-------------|-------------------------|-------------------------|------------------------------|-----------|---------------------|
| ①   | normal   | dry         | 45°                     | 0°                      | 25°                          | 100%      | 70                  |
| ②   | deep     | dry         | 60°                     | 20°                     | -10°                         | 100%      | 70                  |
| ③   | deep     | water       | 60°                     | 20°                     | -10°                         | 100%      | 70                  |
| ④   | deep     | water       | 45°                     | 20°                     | 10°                          | 100%      | 70                  |
| ⑤   | deep     | water       | 60°                     | 0°                      | -10°                         | 100%      | 70                  |
| ⑥   | deep     | water       | 45°                     | 0°                      | -10°                         | 100%      | 70                  |
| ⑦   | deep     | water       | 45°                     | 0°                      | -10°                         | 75%       | 70                  |
| ⑧   | deep     | water       | 45°                     | 0°                      | -10°                         | 50%       | 70                  |
| ⑨   | deep     | water       | 60°                     | 0°                      | -10°                         | 100%      | 62                  |

doi:10.1371/journal.pone.0145798.t001

acceleration levels. MRI data of the lower extremities were recorded along with the attached skin markers after the motion analyses.

Subsequently, the musculoskeletal model was scaled onto the subject from the motion analyses according to the osseous anatomic structure derived from the MRI data recorded and body weight. Likewise, segment-fixed points were generated in the model based on the position of the skin markers relative to the bones. The model was then parametrized with varying maneuvers, implant positions (inclination  $\iota$ , cup anteversion  $\beta$ , stem antetorsion  $\vartheta$ ), subject's body mass, and muscle elements  $n$ , resulting into several model variations (Table 1). Design parameters (CCD angle  $\nu = 131^\circ$ , neck length  $l = 53.9$  mm, head offset  $h = 0$  mm, head diameter  $d = 28$  mm) and implant setting ( $s = -5$  mm) were kept constant. For each variation the corresponding measured maneuver was transferred onto the joint coordinates of the model  $\mathbf{q}$  by means of a model-based least squares fit. The distances between skin markers and related segment-fixed points were minimized by coupled springs [37], where the cost function could be interpreted as potential of virtual springs between trajectories of the skin markers and compliant trajectories of the segment-fixed points. This procedure is equivalent to global optimization techniques which were shown to reduce skin motion artifacts [63, 64]. Hence, a consistent set of joint coordinates  $\mathbf{q}(t)$  was obtained for each variation from the averaged and smoothed kinematic data.

### Configurations and validation

Overall, nine HiL simulations were configured with varying model and test parameters (Table 1): Normal sitting down and standing up was simulated with parameter set ① for validation of the HiL test system. Based on parameter sets ② and ③, experiments with dry articulating surfaces and with lubrication by deionized water were conducted, to evaluate the influence of friction for the metal-to-polyethylene bearing. For the same deep maneuver, the influence of the implant position (inclination  $\iota$ , cup anteversion  $\beta$ , stem antetorsion  $\vartheta$ ) on the impingement and dislocation behavior was considered within configurations ③, ④, ⑤ and ⑥. With regard to specific maneuvers to be evaluated in the near future, it might occur that the calculated loads exceed the calibrated measurement range of the force-torque sensor. Therefore, scaling of the subject's body mass may become necessary, as addressed in parameter sets ⑥, ⑦, ⑧. Furthermore, the impact of removing muscle structures on the dislocation process was exemplified in parameter set ⑨. All small external rotators of the hip joint (Mm. gemelli,

Mm. obturatorii, M. piriformis and M. quadratus femoris) were removed from the model emulating resection of these muscles as performed during a posterior surgical approach [65].

All model variations were exported into real-time capable machine code calculated with 1 ms as fixed time step size. A scaling factor was introduced between simulation time and real time as a control cycle of 8 ms was used for the robot controller. The exported model variations were embedded into the control system to allow interactions with the physical setup. Before each HiL simulation, the force-torque sensor was calibrated for the given joint motion by subtracting the resulting torque due the endeffector's weight at the femoral head. Both initial angular position and force was applied by the robot according to the initial values of the model. At this position, all values of the measured relative displacements  $c$  were reset to zero. Finally, the HiL simulation was initialized by the model. To assure reproducibility, each HiL simulation was repeated three times.

For validation purposes, hip contact forces were derived from in vivo measurements of routine activities [33]. These included trials from three male patients with instrumented THR for sitting down and standing up activities (chair height 50 cm). The force data were transformed to a standardized global reference frame [66] and normalized with respect to time. As the patients exhibited varying timing, the force components and resultants were shifted and rearranged for each trial with respect to the maxima of their resultant used as reference point [67]. Mean values and standard deviations ( $\pm$ SD) were estimated for each patient and activity, which enabled a subject-to-patients comparison [68] with the outcomes of the HiL test system configured with parameter set ①. Furthermore, two validation requirements were defined: First, reproduction of major trends for all force components given by the envelopes of the in vivo data of the three patients; and second, prediction of force levels comparable to the in vivo hip contact forces.

## Results

### Validation of the HiL test system

Predicted hip joint reaction forces of parameter set ① (Table 1) were compared to in vivo hip contact forces (mean values  $\pm$ SD) derived from the three instrumented patients [33] for normal sitting down and standing up activities (Fig 4). Qualitatively, normal sitting down is characterized by a sudden rise in the hip contact force during lowering from the standing position. With increasing chair contact, the force level drops to a plateau reached during actual sitting. The load profile described is reversed in the standing up activity. These force characteristics were present in all force components and resultants of the in vivo measurements, and were reproduced well by the HiL test system. The predicted values fell predominantly into the envelopes spanned by the patients' data. Differences were noted for the sitting down activity at peak values of the x-component and the resultant, and the z-component during the standing and sitting phase, respectively. Standing up showed discrepancies at peak values of the y-component.

Quantitatively, the HiL test system estimated peak force values of -134.2%BW, 135.0%BW, 82.7%BW and 195.4%BW for x-, y-, z-components and absolute value during sitting down. In comparison to the patients' measurements, largest deviations for these peak values remained in x-direction ranging from 12.0% to 25.6% (Table 2). The closest match was found with patient HSR differing with an absolute peak value of 10.5% (25.6%, 5.3%, -2.3% in x-, y-, z-direction). Standing up revealed higher force levels reaching 220.8%BW for the peak resultant (-133.7%BW, 160.0%BW, 87.6%BW for x-, y-, z-components). Largest deviations were observed in y-direction overestimating the in vivo data by 21.1% to 38.0% at peak values. According to the peak resultant, the predictions came closest to patient PFL with a deviation of 4.9% (-10.6%, 21.8%, -5.7% for x-, y-, z-components).

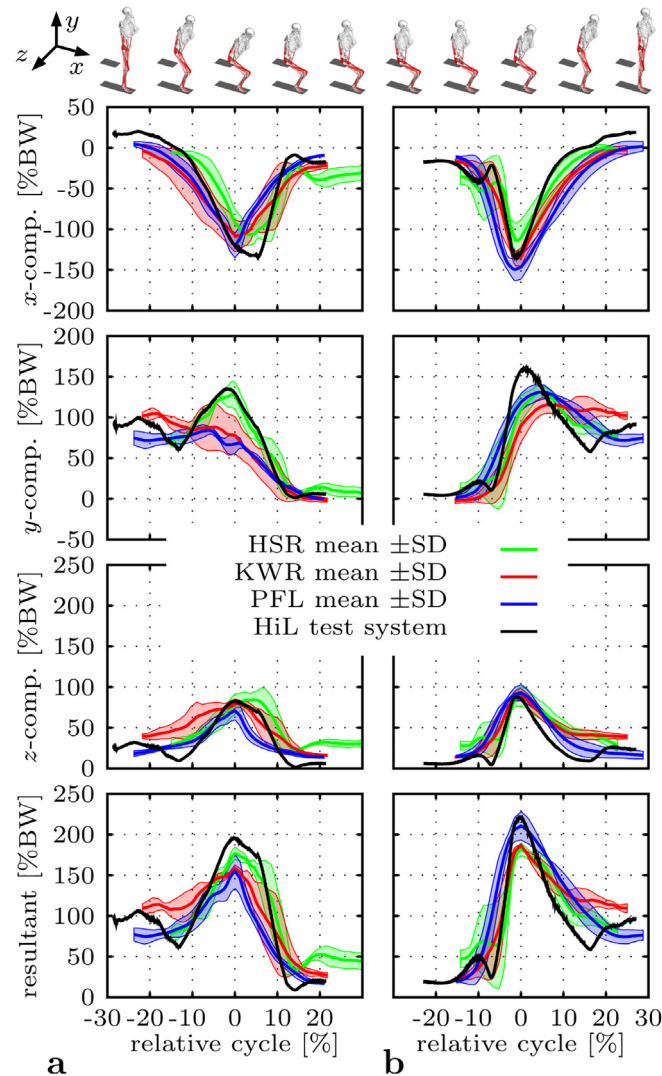

**Fig 4. Predicted hip joint reaction force  $f^r$  for the normal maneuver compared to in vivo measurements of three male patients (HSR, KWR and PFL) [33].** All force components are given with respect to the global reference frame [66], shifted and rearranged with respect to the maxima of the corresponding resultant used as reference point [67], and mirrored to the left hip joint [33]. **a** Sitting down. **b** Standing up.

doi:10.1371/journal.pone.0145798.g004

**Table 2. Relative deviations estimated at peak values between predictions of the HiL test system and hip contact forces derived from three instrumented patients [33] for normal sitting down and standing up.**

| patient | activity     | relative deviations [%] |             |             |           |
|---------|--------------|-------------------------|-------------|-------------|-----------|
|         |              | x-component             | y-component | z-component | resultant |
| PFL     | sitting down | 12.0                    | 60.3        | 17.0        | 26.2      |
|         | standing up  | -10.6                   | 21.8        | -5.7        | 4.9       |
| KWR     | sitting down | 24.1                    | 29.0        | 3.9         | 23.7      |
|         | standing up  | -1.7                    | 38.0        | -3.3        | 18.2      |
| HSR     | sitting down | 25.6                    | 5.3         | -2.3        | 10.5      |
|         | standing up  | 17.0                    | 21.1        | -0.7        | 21.5      |

doi:10.1371/journal.pone.0145798.t002

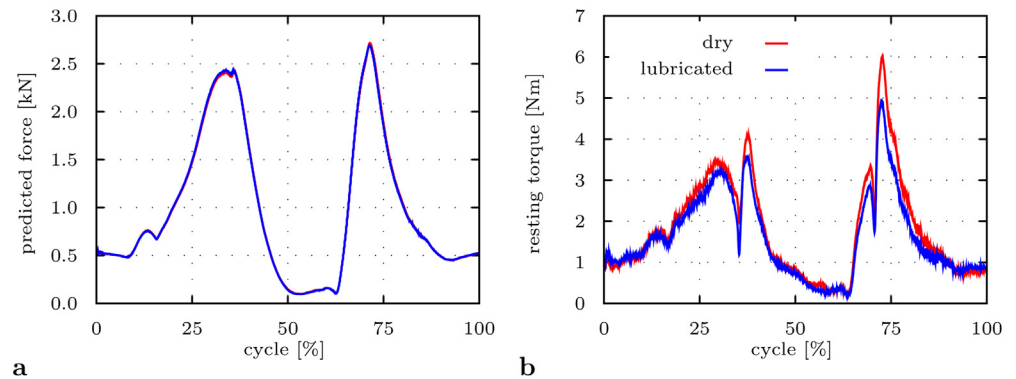

**Fig 5. Impact of friction under dry and lubricated conditions on HiL-simulated THR load situation for a deep seating-to-rising motion cycle.** The HiL simulations are based on parameter sets ②, ③ from Table 1. **a** Absolute value of predicted reaction force  $|f^r|$ . **b** Absolute value of measured resisting torque  $|r^f|$ .

doi:10.1371/journal.pone.0145798.g005

### Impact of joint lubrication

For both friction conditions (parameter sets ② and ③), the absolute value of the resisting torque (Fig 5b) was roughly proportional to the absolute value of the joint force (Fig 5a). The brief sharp drops of the resisting torque were caused by changes of the direction of the flexion angle under high load during seating-to-rising. Joint lubrication reduced the absolute value of friction torque over the whole motion cycle (Fig 5b).

### Impact of implant position

The flexion angle over time was defined between the femur axis and the frontal pelvis plane, whereby pelvic tilt was taken into account (Fig 6a). Impingements were typically indicated by an abrupt rise of the resisting torque (Fig 6d), caused by the eccentric contact force between the femoral neck and the cup rim. Dislocation became evident by an increasing displacement between the rotation centers of prosthetic head and acetabular cup (Fig 6c).

For parameter sets ③ and ④, each with cup anteversion  $20^\circ$ , neither impingement nor dislocation occurred for cup inclination angles of  $45^\circ$  and  $60^\circ$ . Besides that, alteration of stem antetorsion  $\vartheta$  lead to changed joint angles and hence reaction forces  $|f^r|$  and resisting torques  $|r^f|$ . Comparing parameter sets ③ vs. ④, it could be shown that  $20^\circ$  less cup anteversion  $\beta$  of the cup caused anterior impingement during deep sitting at  $78^\circ$  flexion (27% of the motion cycle). A similar effect occurred, if cup inclination  $\iota$  was decreased, comparing ⑤ vs. ⑥. In this case,  $15^\circ$  less cup inclination  $\iota$  caused  $12^\circ$  decreased degree of flexion until impingement. Comparing parameter sets ⑤ vs. ⑥, the RoM until impingement was reduced both by  $20^\circ$  less cup anteversion  $\beta$  and  $20^\circ$  less stem antetorsion  $\vartheta$  (from  $10^\circ$  to  $-10^\circ$ ), leading from an impingement-free maneuver to anterior impingement and posterior dislocation at  $66^\circ$  and  $87^\circ$  flexion, respectively.

### Impact of subject's body mass

Reduction of body mass was accompanied with consistent lower amounts of reaction forces and resisting torques over the course of the maneuver (Fig 7). No alterations of RoM until impingement and dislocation were indicated.



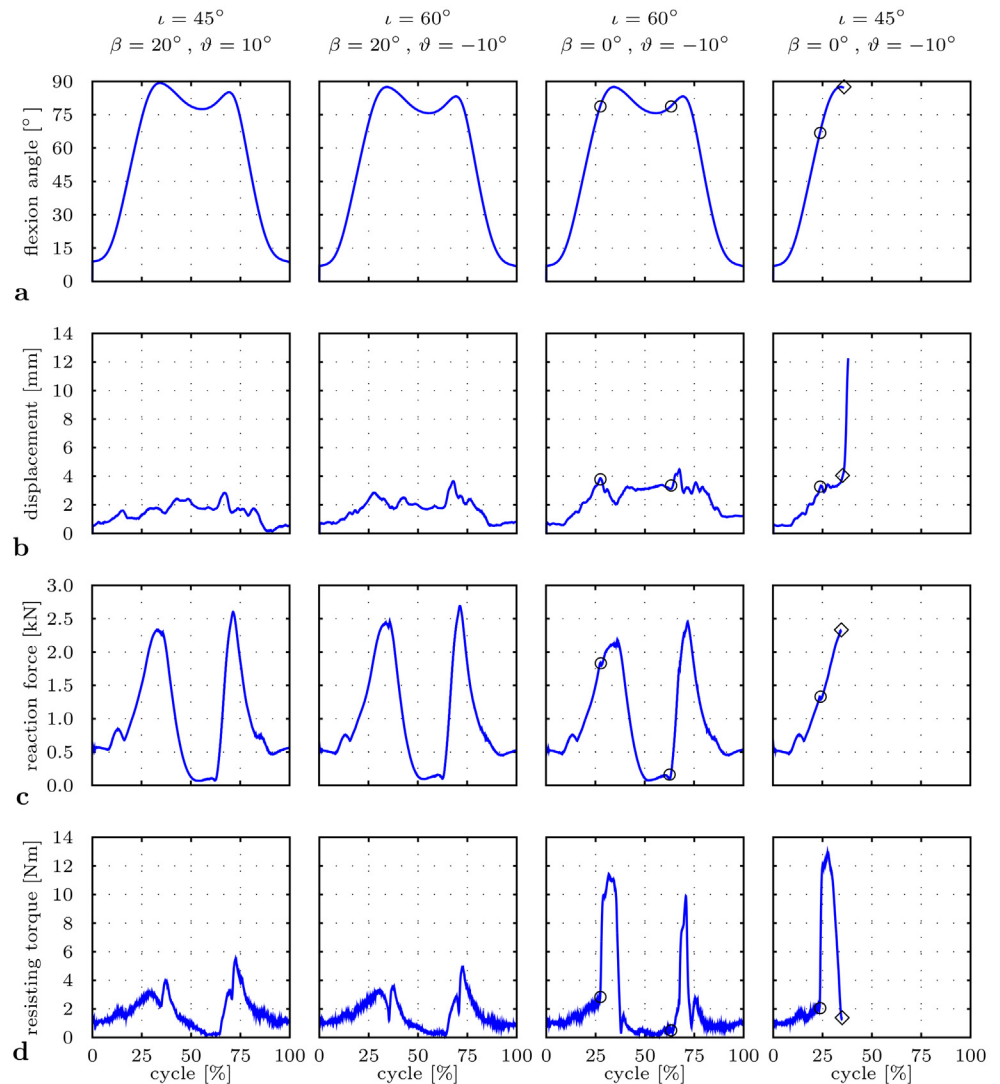

**Fig 6. Impact of implant position on HiL-simulated THR load situation for a deep seating-to-rising motion cycle.** Implant positions are defined by inclination  $\iota$ , cup anteverision  $\beta$ , and stem ante-torsion  $\vartheta$  with parameter sets ③, ④, ⑤, ⑥ from Table 1. Impingement occurs at ○ and dislocation at ◇. **a** Flexion angle  $q_3$ . **b** Measured displacement  $|c|$  between femoral head and acetabular cup. **c** Predicted reaction force  $|f'|$ . **d** Measured resisting torque  $|r'|$ .

doi:10.1371/journal.pone.0145798.g006

### Impact of removing muscle structures

The outcomes of the emulated posterior surgical approach were contrasted with the results of the HiL simulation with the same implant position, but intact muscles (parameter set ③ vs. ④). The rotational motion remained identical between the two variations throughout the considered maneuver (Fig 8a). Both indicated impingement after 78° hip flexion (27% of the motion cycle). For the posterior approach, the femoral head dislocated after 85° hip flexion (38% of the motion cycle), in contrast to the intact case where the head remained in the cup. The dislocation process observed was accompanied by a lower load level of the reaction force and the resisting torque. The reduced load level was mainly due to the mediolateral force

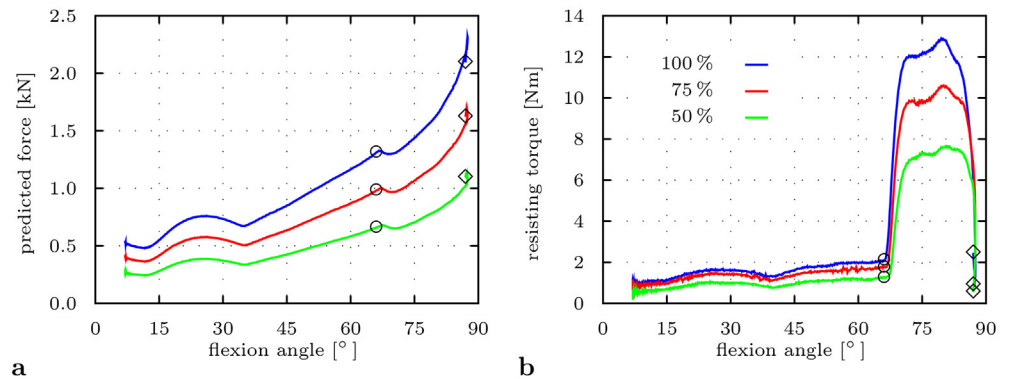

**Fig 7. Impact of load level adjusted by body mass on HiL-simulated THR load situation for deep seating-to-rising.** The HiL simulations are based on parameter sets ②, ③, ④ from Table 1. Impingement occurs at ○ and dislocation at ◇. **a** Predicted reaction force  $|f^r|$  over flexion angle. **b** Measured resisting torque  $|r^r|$  over flexion angle.

doi:10.1371/journal.pone.0145798.g007

component dropping at peak values from  $-1172$  N for the intact to  $-638$  N for the resected case. The alterations within the force components was reflected by changes in force directions (Fig 8b).

## Discussion

In the present work, a novel HiL simulation approach was used to analyze the impact of certain test conditions on a potential THR instability maneuver. Within a selected set of parameters, these test conditions included variation in joint lubrication, implant position, subject's body mass and muscle structures. Lubrication of the artificial joint was shown to cause less friction torques. This is supported by data of Bishop et al. [69] who examined friction characteristics of hard-hard bearings. As regards implant position, it could be demonstrated that less cup anteversion and inclination lead to earlier impingement in flexion motion, as confirmed by previous studies [4, 8]; even though these had not considered realistic musculoskeletal conditions as well as pelvic tilt. Apart from the load level, no influence of body mass was found on the impingement and dislocation behavior in the analyzed parameter sets. This means that down-scaling of subject's body mass may be acceptable for further studies with regard to the limited calibrated measurement range of the force-torque sensor. Moreover, emulation of a posterior surgical approach indicated alterations in THR loading and the instability process in contrast to a reference case with intact muscles. Van Arkel et al. [70] revealed that most of the external hip rotators cannot contribute to edge loading solely based on their lines of action. This may explain the lower load level observed especially in mediolateral direction when removing the small external rotators, which directed the hip joint reaction force more towards the entry plain of the cup. Hence, a reduced force closure was achieved between the THR components than with intact musculature, which seemed to promote levering out of the femoral head after impingement for the considered implant position and maneuver.

One of the key issues for considering realistic THR dynamics is, how to adequately address muscle forces such that anatomic and physiological conditions are met in a testing or simulation environment. Whereas clinical studies are primarily limited as many crucial factors cannot be maintained on a constant and independent level, testing of real components or simulations

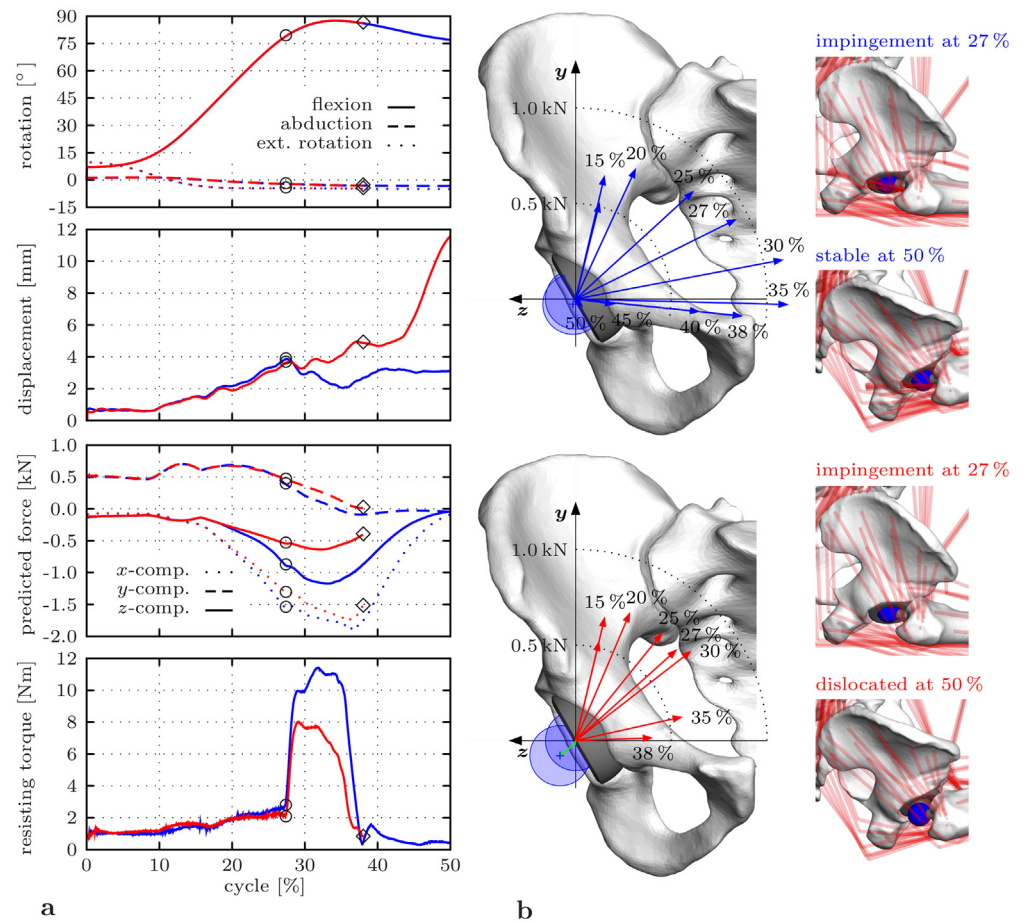

**Fig 8. Impact of muscle element removal emulating a posterior surgical approach on HiL-simulated THR load situation with focus on the sitting down phase of the deep maneuver.** The HiL simulations are based on parameter sets ②, ③ from Table 1. **a** Comparison between the intact (blue lines) and the resected (red lines) case for hip joint rotations  $q_3, q_1, q_2$ , measured displacement  $|c|$  between femoral head and acetabular cup, components of the predicted reaction force  $f^r$  given in the pelvic reference frame [49], and measured resisting torque  $|\tau^r|$ . Impingement occurs at  $\circ$  and dislocation at  $\diamond$ . **b** Direction of the hip joint reaction force with respect to the frontal plane of the pelvic reference frame [49] with illustration of the head position at and after impingement for the intact (above) and the resected (below) case.

doi:10.1371/journal.pone.0145798.g008

using mathematical models are suitable approaches for illuminating cause and effect on a systematic basis. But both also entail certain short-comings.

Actuated along one or more directions, mechanical setups allowed for application of constant [13, 71] or prescribed load patterns [11, 12] onto THR components. It remains an open question how passive and active soft tissue structures can be adequately accounted for based on these setups. In contrast to that, specimen-based testing promises incorporation of real soft tissue such as ligaments and capsular structures, including their mechanical response [30–32]. Muscle forces were often emulated statically by cable and pulley systems [15, 16]. However, the muscle forces applied may not reproduce in vivo conditions, not to mention the consideration of all relevant muscle structures spanning the hip joint. Moreover, human specimens do not permit reproducible and comparable evaluation of various parameters under exactly the same boundary conditions due to their decay after extraction.

In addition to testing procedures, mathematical models have been established to be useful tools for biomechanical investigations. Once deployed, simulations can be almost infinitely repeated and parameters arbitrarily varied. Several analytic approaches [5–9, 72] assisted to study joint kinematics with respect to their technical RoM without consideration of soft tissue structures. Other studies [4, 14, 15, 19, 32] focused on stresses and strains acting in THR components during the dislocation process by using finite element analysis. Yet, models including contact mechanics are afflicted with persistent uncertainties concerning the contact conditions.

More comprehensive approaches as regards physiological conditions relied on musculoskeletal models. Higa et al. [17] detected dislocation for passive motions by impingement or an outwardly directed vector of the joint reaction force from the cup's entry surface. Besides the lack of active muscle forces, there is unfortunately no way to know whether a given impingement event or traction force will or will not presage dislocation based on their approach. On the contrary, Nadzadi et al. [18] obtained hip joint kinematics of several subjects and corresponding force data derived from a validated musculoskeletal model [73]. The data served as boundary conditions for several finite element analyses which aimed to evaluate dislocation risk for realistic maneuvers of the lower extremity [18, 19, 21, 22, 32, 74, 75].

This approach, however, bears a major shortcoming, apart from common limitations arising from finite element modeling. Prescribed motion as well as loading used as boundary conditions imply the assumption that femoral head and acetabular cup remain concentrically aligned throughout the entire simulation of a dislocation-associated maneuver [18]. This means that no interdependency between motion and forces is taken into account during events of instability which may potentially change the subluxation processes investigated. Consequently, it remains unclear whether rising resisting torques or soft tissue forces can actually prevent the prosthetic head from dislocating, which especially applies for spontaneous separation. Elkins et al. [22, 75] even neglected that alterations in femoral parameters such as neck length and stem antetorsion entail changes in overall musculoskeletal dynamics and hence the load situation at the hip joint as outlined by several researchers [23–26].

In this sense, reproduction of THR dynamics while accounting for muscle activity and passive soft tissue response may remain an irreconcilable challenge based on the outlined approaches. It seems impossible to comply with these demands within an experimental test setup alone. Mathematical models may approximate *in vivo* conditions to a valid extent, though complex contact modeling is limited. These trade-offs led to consideration of alternative approaches which resulted into the HiL test system presented.

Several limitations need to be mentioned with respect to the HiL test system in the current state. First, integration of force control along constrained directions of THR means that the dynamics of the respective movements are not governed by the equations of motion of the embedded multibody model. Instead, these are based on the settings of the force controller [36]. This assumption is considered to be acceptable for minor displacements/rotations compared to the motion in the free directions. That is especially the case as long as the robot is able to apply the desired force values onto the THR components, for instance during subluxation.

Second, the use of a robotic actuator system within HiL control loops implies further demands on the testing procedure. Krenn and Schäfer [76] evaluated the stability of HiL simulations using an industrial robot to emulate the dynamic behavior of a manipulator during contact operations with a real object in space. After varying influencing parameters within a theoretical example, they concluded that large delay times and low sampling rate may cause instabilities of the HiL simulation. In a similar context, Boge and Ma [77] specified two conditions required for high fidelity of contact maneuvers within a robot-based HiL simulation: fast response of the robot to the control command, and same dynamic behavior of the robot's endeffector and the embedded multibody model during contact. The time between command

and execution is given by the robot's responding time which was between four to eight times the control cycles in their study. Boge and Ma [77] also stated that industrial robots would not completely conform to the second condition for their HiL application due to their high stiffness.

As all issues concerning delay times, sampling rate and potential instability of the HiL control loops specifically depend on the industrial robot and its control system, the functionality of the HiL test system was verified in previous studies. Kähler et al. [36] tested both position and force control modes by embedding a simulated spring-damper oscillator with one degree of freedom into the HiL environment. Concerning THR stability, functionality of the hybrid position-force control was assured by simulating the dislocation process of a standard THR under prescribed boundary conditions [34]. The outcomes of this study showed overall superior performance compared to results of a mechanical setup [13] in terms of measuring sensitivity and reproducibility. Using the same operation mode, Fabry et al. [11] reproduced physiological loading conditions to evaluate the dynamics of tripolar THR systems. Moreover, the functional principle of the HiL approach was proven for testing THR stability with respect to a deep squatting maneuver [37].

Third, musculoskeletal modeling rests upon a rigid multibody approach which involves idealizations and simplifications of the real biomechanical system. Emphasis was placed on well reflecting the geometric proportions and degrees of freedom of the real skeletal system which was pointed out to impact muscle force distribution [24]. Active muscle structures modeled as muscle elements were assumed to act along straight lines neglecting volumetric effects [45]. Besides bone wrapping, additional segment-fixed via-points were incorporated to gain a more realistic representation of curved muscle paths especially adjacent to the hip joint, suggested to improve predictions of reaction force components [78]. This muscle discretization, however, may not entirely reflect physiological deflections of muscle paths along with complex intermuscular contact interactions, which in particular applies on muscles with large curvatures. Further improvements in this regard may be obtained by implementing via-points movable along wrapping surfaces [70, 78], with verification against muscle paths derived from MRI data [68]. According to Vrahas et al. [79] passive soft tissue contribute less than 10% to intersegmental torques during gait and stair climbing. Consequently, passive forces arising from muscular or capsular structures were not considered. While this simplification may hold true for common activities, the effect of these structures should be reevaluated for extreme dislocation-associated maneuvers.

Estimation of muscle forces was based on an inverse dynamics analysis in order to gather hip joint reaction forces. The current model formulation comprises two redundancy problems. Vaughan et al. [46] indicated that the neuromuscular strategy may be based on minimizing joint torques during activities with at least one loop closure. As their optimization approach avoids computationally expensive calculations of explicit loop closure conditions [37], a similar way was pursued in the present work. To further reduce modeling complexity, the closed loop problem was accounted for by defining symmetry conditions with respect to the pelvic sagittal plane omitting the contralateral limb. This simplification is supported by findings in THR patients indicating equivalent kinematics between operated and non-operated hip and no overcompensation by the contralateral side during sitting down and standing up activities [80]. However, the symmetry conditions should be reconsidered when other maneuvers are the subject of interest.

The distribution problem of muscle forces was addressed by using optimization techniques [44, 45]. Although it seems appealing that the nervous system governs motion by controlling muscle forces in an optimal manner, it remains an intricate task to find physiological or even neurophysiological evidence of appropriate cost functions. Both synergistic and antagonistic



activity comparable to EMG data were found to be estimated when using non-linear cost functions in contrast to linear ones [81, 82]. Other factors such as the definition of weighting coefficients may also promote antagonistic prediction [83]. However, Herzog and Binding [84] showed that co-contraction is only predicted when multi-joint antagonists are present. Independent from the definition of the cost functions, it was also observed that muscle force prediction reacts with great sensitivity to model-based deviations of kinematic data [85], muscle origin and insertion points [86], lever arms and physiological cross section areas [87]. Furthermore, constraining muscle forces within physiological boundaries was shown to remarkably reduce the number of possible solutions [88]. These findings support the notion that detailed modeling of the musculoskeletal system rather leads to realistic results than the optimization procedure per se. Hence, an approach similar to Anderson and Pandy [40] was followed in this work, which allowed incorporation of muscle architecture and physiology explicitly in the equations of motion.

Despite the limitations involved with musculoskeletal modeling, Brand et al. [73] reported comparable peak predictions and patterns during gait against hip contact forces arising from one patient with an instrumented implant. Heller et al. [55] used a cycle-to-cycle comparison to validate predicted hip joint reaction forces against in vivo data from four patients, revealing good agreement in both patterns and magnitudes. Their calculated peak forces overestimated the measurements with deviations ranging from 0.3% to 33% for walking and from 3% to 37% during stair climbing. In this sense, the HiL test system revealed physiologically reasonable force levels, with deviations at absolute peak values of 10.6% to 26.2% for normal sitting down and 4.9 to 21.5% for normal standing up, respectively, against in vivo data of three patients [33]. Analogous to Martelli et al. [68], further differences noted within this work may arise from diverging health conditions of the modeled subject and the instrumented patients [33], as well as varying implant positions [23]. Moreover, Nadzadi et al. [18] estimated considerably elevated hip joint reaction forces for extreme sit-to-stand maneuvers based on a previously validated model [73], consistent with the HiL outcomes of the dislocation-associated maneuver. Hence, it can be inferred that the HiL test system is capable of reproducing physiological conditions for testing THR dislocation; at least for symmetric leg maneuvers.

Depending on the surgical approach specific muscular and capsular structures are incised, resected or damaged intraoperatively to gain access to the hip joint. Especially, the posterior approach involves larger loss of soft tissue as it requires resection of the small external rotators as well as incision of the posterior capsule [65]. Hence, it seems not surprising that this approach was reported to entail higher dislocation rates than others [29]. Pellicci et al. [27] argued that these unsatisfactory outcomes are caused by the dead space, left after resected soft tissue and usually found posteriorly in revision procedures. By performing enhanced soft tissue repair before closure, they succeeded to significantly improve the postoperative results as confirmed subsequently by other clinicians [28, 29].

Although the mechanical aspects of the hip capsule have been illuminated to a certain extent [89–91], there are only few studies providing insights in how soft tissue structures contribute to resistance against THR dislocation. Delp et al. [26] stated that extension of the femoral offset, a widespread medium by surgeons to adjust tension on the hip joint, increases the muscles' active moment-generation capacity and passive muscular forces. Specimen-based studies [30, 31] indicated that full repair of muscle and capsule tissue after the posterior approach lead to augmentation of the torque measured along internal/external rotation until final dislocation in contrast to no or minor repairs. Elkins et al. [32] concluded that well-designed repairs are able to restore integrity of capsular structures which was proven by similar resisting torques against dislocation as obtained for the intact capsule. The findings of this work suggest that resection of the small external hip rotators may increase the risk of dislocation due to decrease in load

level and inauspicious alterations of force directions, in particular for malpositioned implants. Furthermore, the mentioned muscle structures seem to provide active resistance against the dislocation process when remained intact. These suggestions, however, need to be substantiated further within subsequent studies. This includes incorporating the mechanical response of the hip capsule to clarify to what extent these structures mitigate dislocation.

The presented validation and first research applications show that HiL simulations are able to predict the influence of cup positioning and muscle removal as well as lubrication and body mass on THR stability. In future studies, further parameter sets regarding implant designs and positions will be tested in order to gain new insights into impingement and dislocation processes which improve implant safety as well as surgical technique.

## Acknowledgments

The authors would like to thank the Deutsche Forschungsgemeinschaft (BA 3347/3-1/2 and WO 452/8-1/2) for supporting the research work presented, Andreas Mattke and Norbert Wolff, University of Rostock, for their assistance during motion capturing, and Professor Klaus Schittkowski, University of Bayreuth, for providing the FORTRAN subroutine to solve the quadratic optimization problems.

## Author Contributions

Conceived and designed the experiments: SH DK MK RG RR RS JZ RB CW. Performed the experiments: SH MK RG. Analyzed the data: SH DK RG RB CW. Contributed reagents/materials/analysis tools: SH DK RG RS RB. Wrote the paper: SH DK RB CW. Designed the software used in analysis: SH MK RG RR JZ. Designed the HiL control architecture: SH MK RG RR JZ.

## References

1. Garellick G, Karrholm J, Rogmark C, Rolfson O, Herberts P. Annual Report 2011. Goteborg, Sweden; 2012.
2. Bozic KJ, Kurtz SM, Lau E, Ong K, Vail TP, Berry DJ. The Epidemiology of Revision Total Hip Arthroplasty in the United States. *Journal of Bone and Joint Surgery—Series A*. 2009; 91A(1):128–133. doi: [10.2106/JBJS.H.00155](https://doi.org/10.2106/JBJS.H.00155)
3. Burroughs BR, Hallstrom B, Golladay GJ, Hoeffel D, Harris WH. Range of motion and stability in total hip arthroplasty with 28-, 32-, 38-, and 44-mm femoral head sizes—An in vitro study. *Journal of Arthroplasty*. 2005; 20(1):11–19. doi: [10.1016/j.arth.2004.07.008](https://doi.org/10.1016/j.arth.2004.07.008) PMID: [15660054](https://pubmed.ncbi.nlm.nih.gov/15660054/)
4. Kluess D, Martin H, Mittelmeier W, Schmitz KP, Bader R. Influence of femoral head size on impingement, dislocation and stress distribution in total hip replacement. *Medical Engineering and Physics*. 2007; 29(4):465–471. doi: [10.1016/j.medengphy.2006.07.001](https://doi.org/10.1016/j.medengphy.2006.07.001) PMID: [16901743](https://pubmed.ncbi.nlm.nih.gov/16901743/)
5. D'Lima DD, Urquhart AG, Buehler KO, Walker RH, Colwell CW. The effect of the orientation of the acetabular and femoral components on the range of motion of the hip at different head-neck ratios. *Journal of Bone and Joint Surgery—Series A*. 2000; 82(3):315–321.
6. Bader R, Willmann G. Ceramic cups for hip endoprostheses. 6: Cup design, inclination and antetorsion angle modify range of motion and impingement. *Biomedical Engineering*. 1999; 44:212–219. PMID: [10472729](https://pubmed.ncbi.nlm.nih.gov/10472729/)
7. Widmer KH, Majewski M. The impact of the CCD-angle on range of motion and cup positioning in total hip arthroplasty. *Clinical Biomechanics*. 2005; 20(7):723–728. doi: [10.1016/j.clinbiomech.2005.04.003](https://doi.org/10.1016/j.clinbiomech.2005.04.003) PMID: [15964112](https://pubmed.ncbi.nlm.nih.gov/15964112/)
8. Bader R, Willmann G. Ceramic acetabular cups for hip endoprostheses. 7: How do position of the center of rotation and the CCD angle of the shaft modify range of motion and impingement? *Biomedical Engineering*. 1999; 44:345–351. PMID: [10675990](https://pubmed.ncbi.nlm.nih.gov/10675990/)
9. Kliewe C, Souffrant R, Kluess D, Woernle C, Broekel K, Bader R. Analytical computational model for the determination of the influence of design and surgical factors on the range of motion of total hip replacements. *Biomedical Engineering*. 2010; 55(1):47–55. doi: [10.1515/bmt.2010.005](https://doi.org/10.1515/bmt.2010.005) PMID: [20128745](https://pubmed.ncbi.nlm.nih.gov/20128745/)

10. Yoshimine F. The influence of the oscillation angle and the neck anteversion of the prosthesis on the cup safe-zone that fulfills the criteria for range of motion in total hip replacements. The required oscillation angle for an acceptable cup safe-zone. *Journal of Biomechanics*. 2005; 38(1):125–132. doi: [10.1016/j.jbiomech.2004.03.012](https://doi.org/10.1016/j.jbiomech.2004.03.012) PMID: [15519347](https://pubmed.ncbi.nlm.nih.gov/15519347/)
11. Fabry C, Kaehler M, Herrmann S, Woernle C, Bader R. Dynamic behavior of tripolar hip endoprotheses under physiological conditions and their effect on stability. *Medical Engineering and Physics*. 2014; 36(1):65–71. PMID: [24209390](https://pubmed.ncbi.nlm.nih.gov/24209390/)
12. Kiguchi K, Yamashita A, Sasaki M, Ueno M, Kobayashi T, Mawatari M, et al. Control of an Artificial-Hip-Joint Simulator to Evaluate Dislocation. In: *International Conference on Control, Automation and Systems*. Seoul, Korea; 2008. p. 1942–1945.
13. Bader R, Scholz R, Steinhauser E, Busch R, Mittelmeier W. Method for the evaluation of factors influencing the dislocation stability of total hip endoprotheses. *Biomedical Engineering*. 2004; 49(5):137–144. doi: [10.1515/BMT.2004.027](https://doi.org/10.1515/BMT.2004.027) PMID: [15212199](https://pubmed.ncbi.nlm.nih.gov/15212199/)
14. Scifert CF, Brown TD, Pedersen DR, Callaghan JJ. A finite element analysis of factors influencing total hip dislocation. *Clinical Orthopaedics and Related Research*. 1998; 355:152–162. PMID: [9917600](https://pubmed.ncbi.nlm.nih.gov/9917600/)
15. Scifert CF, Noble PC, Brown TD, Bartz RL, Kadakia N, Sugano N, et al. Experimental and computational simulation of total hip arthroplasty dislocation. *Orthopedic Clinics of North America*. 2001; 32(4):553–567. doi: [10.1016/S0030-5898\(05\)70226-1](https://doi.org/10.1016/S0030-5898(05)70226-1) PMID: [11689369](https://pubmed.ncbi.nlm.nih.gov/11689369/)
16. Bartz RL, Noble PC, Kadakia NR, Tullos HS. The effect of femoral component head size on posterior dislocation of the artificial hip joint. *Journal of Bone and Joint Surgery—Series A*. 2000; 82(9):1300–1307.
17. Higa M, Tanino H, Abo M, Kakunai S, Banks SA. Effect of acetabular component anteversion on dislocation mechanisms in total hip arthroplasty. *Journal of Biomechanics*. 2011; 44(9):1810–1813. doi: [10.1016/j.jbiomech.2011.04.002](https://doi.org/10.1016/j.jbiomech.2011.04.002) PMID: [21529811](https://pubmed.ncbi.nlm.nih.gov/21529811/)
18. Nadzadi ME, Pedersen DR, Yack HJ, Callaghan JJ, Brown TD. Kinematics, kinetics, and finite element analysis of commonplace maneuvers at risk for total hip dislocation. *Journal of Biomechanics*. 2003; 36(4):577–591. doi: [10.1016/S0021-9290\(02\)00232-4](https://doi.org/10.1016/S0021-9290(02)00232-4) PMID: [12600348](https://pubmed.ncbi.nlm.nih.gov/12600348/)
19. Pedersen DR, Callaghan JJ, Brown TD. Activity-dependence of the “safe zone” for impingement versus dislocation avoidance. *Medical Engineering and Physics*. 2005; 27(4):323–328. doi: [10.1016/j.medengphy.2004.09.004](https://doi.org/10.1016/j.medengphy.2004.09.004) PMID: [15823473](https://pubmed.ncbi.nlm.nih.gov/15823473/)
20. Lewinnek GE, Lewis JL, Tarr R, Compere CL, Zimmerman JR. Dislocations After Total Hip-Replacement Arthroplasties. *Journal of Bone and Joint Surgery—Series A*. 1978; 60(2):217–220.
21. Elkins JM, Kruger KM, Pedersen DR, Callaghan JJ, Brown TD. Edge-loading severity as a function of cup lip radius in metal-on-metal total hips—A finite element analysis. *Journal of Orthopaedic Research*. 2012; 30(2):169–177. doi: [10.1002/jor.21524](https://doi.org/10.1002/jor.21524) PMID: [21812025](https://pubmed.ncbi.nlm.nih.gov/21812025/)
22. Elkins JM, Daniel M, Pedersen DR, Singh B, Yack HJ, Callaghan JJ, et al. Morbid obesity may increase dislocation in total hip patients: A biomechanical Analysis Hip. *Clinical Orthopaedics and Related Research*. 2013; 471(3):971–980. doi: [10.1007/s11999-012-2512-3](https://doi.org/10.1007/s11999-012-2512-3) PMID: [22907474](https://pubmed.ncbi.nlm.nih.gov/22907474/)
23. Heller MO, Bergmann G, Deuretzbacher G, Claes L, Haas NP, Duda GN. Influence of femoral anteversion on proximal femoral loading: Measurement and simulation in four patients. *Clinical Biomechanics*. 2001; 16(8):644–649. doi: [10.1016/S0268-0033\(01\)00053-5](https://doi.org/10.1016/S0268-0033(01)00053-5) PMID: [11535345](https://pubmed.ncbi.nlm.nih.gov/11535345/)
24. Lenaerts G, Bartels W, Gelaude F, Mulier M, Spaepen A, Van der Perre G, et al. Subject-specific hip geometry and hip joint centre location affects calculated contact forces at the hip during gait. *Journal of Biomechanics*. 2009; 42(9):1246–1251. doi: [10.1016/j.jbiomech.2009.03.037](https://doi.org/10.1016/j.jbiomech.2009.03.037) PMID: [19464012](https://pubmed.ncbi.nlm.nih.gov/19464012/)
25. Lenaerts G, De Groote F, Demeulenaere B, Mulier M, Van der Perre G, Spaepen A, et al. Subject-specific hip geometry affects predicted hip joint contact forces during gait. *Journal of Biomechanics*. 2008; 41(6):1243–1252. doi: [10.1016/j.jbiomech.2008.01.014](https://doi.org/10.1016/j.jbiomech.2008.01.014) PMID: [18346745](https://pubmed.ncbi.nlm.nih.gov/18346745/)
26. Delp SL, Komattu AV, Wixson RL. Superior displacement of the hip in total joint replacement: Effects of prosthetic neck length, neck-stem angle, and anteversion angle on the moment-generating capacity of the muscles. *Journal of Orthopaedic Research*. 1994; 12(6):860–870. doi: [10.1002/jor.1100120614](https://doi.org/10.1002/jor.1100120614) PMID: [7983561](https://pubmed.ncbi.nlm.nih.gov/7983561/)
27. Pellicci PM, Bostrom M, Poss R. Posterior approach to total hip replacement using enhanced posterior soft tissue repair. *Clinical Orthopaedics and Related Research*. 1998; 355:224–228. PMID: [9917607](https://pubmed.ncbi.nlm.nih.gov/9917607/)
28. White RE, Forness TJ, Allman JK, Junick DW. Effect of posterior capsular repair on early dislocation in primary total hip replacement. *Clinical Orthopaedics and Related Research*. 2001; 393:163–167. PMID: [11764346](https://pubmed.ncbi.nlm.nih.gov/11764346/)
29. Kwon MS, Kuskowski M, Mulhall KJ, Macaulay W, Brown TE, Saleh KJ. Does surgical approach affect total hip arthroplasty dislocation rates? *Clinical Orthopaedics and Related Research*. 2006; 447:34–38. PMID: [16741471](https://pubmed.ncbi.nlm.nih.gov/16741471/)

30. Sioen W, Simon JP, Labey L, Van Audekercke R. Posterior transosseous capsulotendinous repair in total hip arthroplasty: A cadaver study. *Journal of Bone and Joint Surgery—Series A*. 2002; 84(10):1793–1798.
31. Mihalko WM, Whiteside LA. Hip mechanics after posterior structure repair in total hip arthroplasty. *Clinical Orthopaedics and Related Research*. 2004; 420:194–198. PMID: [15057097](#)
32. Elkins JM, Stroud NJ, Rudert MJ, Tochigi Y, Pedersen DR, Ellis BJ, et al. The capsule's contribution to total hip construct stability—A finite element analysis. *Journal of Orthopaedic Research*. 2011; 29(11):1642–1648. doi: [10.1002/jor.21435](#) PMID: [21495065](#)
33. Bergmann G, Deuretzbacher G, Heller M, Graichen F, Rohlmann A, Strauss J, et al. Hip contact forces and gait patterns from routine activities. *Journal of Biomechanics*. 2001; 34(7):859–871. doi: [10.1016/S0021-9290\(01\)00040-9](#) PMID: [11410170](#)
34. Herrmann S, Kaehler M, Souffrant R, Rachholz R, Zierath J, Kluess D, et al. HiL simulation in biomechanics: A new approach for testing total joint replacements. *Computer Methods and Programs in Biomedicine*. 2012; 105(2):109–119. doi: [10.1016/j.cmpb.2011.07.012](#) PMID: [21852016](#)
35. Herrmann S. Dynamic testing of total hip and knee replacements under physiological conditions. Dissertation. University of Rostock; 2015.
36. Kähler M, Woernle C, Bader R. Hardware-in-the-loop-simulator of constraint elements in mechanical systems. In: Kecskeméthy A, Müller A, editors. *Computational Kinematics*. Berlin: Springer; 2009. p. 159–166.
37. Herrmann S, Kaehler M, Grawe R, Kluess D, Woernle C, Bader R. Physiological-Like Testing of the Dislocation Stability of Artificial Hip Joints. In: Flores P, Viadero F, editors. *New Trends in Mechanism and Machine Science*. vol. 24 of *Mechanisms and Machine Science*. Berlin: Springer; 2015. p. 659–667.
38. Herrmann S, Woernle C, Kaehler M, Rachholz R, Souffrant R, Zierath J, et al. HiL simulation for testing joint stability after total knee arthroplasty. *Multibody System Dynamics*. 2012; 28(1–2):55–67. doi: [10.1007/s11044-011-9283-6](#)
39. Siciliano B, Sciavicco L, Villani L, Oriolo G. *Robotics: Modelling, Planning and Control*. Berlin: Springer; 2008.
40. Anderson FC, Pandy MG. Static and dynamic optimization solutions for gait are practically equivalent. *Journal of Biomechanics*. 2001; 34(2):153–161. doi: [10.1016/S0021-9290\(00\)00155-X](#) PMID: [11165278](#)
41. Blankevoort L, Huiskes R, de Lange A. The envelope of passive knee joint motion. *Journal of Biomechanics*. 1988; 21(9):705–720. doi: [10.1016/0021-9290\(88\)90280-1](#) PMID: [3182875](#)
42. van den Bogert AJ, Smith GD, Nigg BM. In vivo determination of the anatomical axes of the ankle joint complex: an optimization approach. *Journal of Biomechanics*. 1994; 27(12):1477–1488. doi: [10.1016/0021-9290\(94\)90197-X](#) PMID: [7806555](#)
43. Vaughan CL, Hay JG, Andrews JG. Closed loop problems in biomechanics. Part I—A classification system. *Journal of Biomechanics*. 1982; 15(3):197–200. doi: [10.1016/0021-9290\(82\)90253-6](#)
44. Penrod DD, Davy DT, Singh DP. An optimization approach to tendon force analysis. *Journal of Biomechanics*. 1974; 7(2):123–129. doi: [10.1016/0021-9290\(74\)90050-5](#) PMID: [4837546](#)
45. Seireg A, Arvikar RJ. Mathematical-Model for Evaluation of Forces in Lower Extremities of Musculo-skeletal System. *Journal of Biomechanics*. 1973; 6(3):313–326.
46. Vaughan CL, Hay JG, Andrews JG. Closed loop problems in biomechanics. Part II—An optimization approach. *Journal of Biomechanics*. 1982; 15(3):201–220. doi: [10.1016/0021-9290\(82\)90253-6](#) PMID: [7096374](#)
47. Spitzer V, Ackerman MJ, Scherzinger AL, Whitlock D. The visible human male: A technical report. *Journal of the American Medical Informatics Association*. 1996; 3(2):118–130. doi: [10.1136/jamia.1996.96236280](#) PMID: [8653448](#)
48. Kluess D, Souffrant R, Mittelmeier W, Wree A, Schmitz KP, Bader R. A convenient approach for finite-element-analyses of orthopaedic implants in bone contact: modeling and experimental validation. *Computer Methods and Programs in Biomedicine*. 2009; 95(1):23–30. doi: [10.1016/j.cmpb.2009.01.004](#) PMID: [19231021](#)
49. Wu G, Siegler S, Allard P, Kirtley C, Leardini A, Rosenbaum D, et al. ISB recommendation on definitions of joint coordinate system of various joints for the reporting of human joint motion—part I: Ankle, hip, and spine. *Journal of Biomechanics*. 2002; 35(4):543–548. doi: [10.1016/S0021-9290\(01\)00222-6](#) PMID: [11934426](#)
50. Baker R. Letter to the editor: ISB recommendation on definition of joint coordinate systems for the reporting of human joint motion—Part I: Ankle, hip and spin. *Journal of Biomechanics*. 2003; 36(2):300–302.

51. Wu G, van der Helm FCT, Veeger HEJ, Makhsous M, Van Roy P, Anglin C, et al. ISB recommendation on definitions of joint coordinate systems of various joints for the reporting of human joint motion—Part II: Shoulder, elbow, wrist and hand. *Journal of Biomechanics*. 2005; 38(5):981–992. doi: [10.1016/j.jbiomech.2004.05.042](https://doi.org/10.1016/j.jbiomech.2004.05.042) PMID: [15844264](https://pubmed.ncbi.nlm.nih.gov/15844264/)
52. Winter DA. *Biomechanics and motor control of human movement*. New York: John Wiley and Sons; 1990.
53. Murray DW. The Definition and Measurement of Acetabular Orientation. *Journal of Bone and Joint Surgery—Series B*. 1993; 75(2):228–232.
54. Schuenke M, Schulte E, Schumacher U. *Thieme Atlas of Anatomy: General Anatomy and Musculoskeletal System*. New York: Thieme; 2005.
55. Heller MO, Bergmann G, Deuretzbacher G, Durselen L, Pohl M, Claes L, et al. Musculo-skeletal loading conditions at the hip during walking and stair climbing. *Journal of Biomechanics*. 2001; 34(7):883–893. doi: [10.1016/S0021-9290\(01\)00039-2](https://doi.org/10.1016/S0021-9290(01)00039-2) PMID: [11410172](https://pubmed.ncbi.nlm.nih.gov/11410172/)
56. Herrmann S, Lenz R, Geier A, Lehner S, Souffrant R, Woernle C, et al. Musculoskeletal modeling of the patellofemoral joint. Dynamic analysis of patellar tracking. *Orthopade*. 2012; 41(4):252–259.
57. Klein Horsman MD, Koopman HF, van der Helm FC, Prose LP, Veeger HE. Morphological muscle and joint parameters for musculoskeletal modelling of the lower extremity. *Clinical Biomechanics*. 2007; 22(2):239–247. doi: [10.1016/j.clinbiomech.2006.10.003](https://doi.org/10.1016/j.clinbiomech.2006.10.003) PMID: [17134801](https://pubmed.ncbi.nlm.nih.gov/17134801/)
58. Ward SR, Eng CM, Smallwood LH, Lieber RL. Are Current Measurements of Lower Extremity Muscle Architecture Accurate? *Clinical Orthopaedics and Related Research*. 2009; 467(4):1074–1082. doi: [10.1007/s11999-008-0594-8](https://doi.org/10.1007/s11999-008-0594-8) PMID: [18972175](https://pubmed.ncbi.nlm.nih.gov/18972175/)
59. An KN, Kaufman KR, Chao EY. Physiological considerations of muscle force through the elbow joint. *Journal of Biomechanics*. 1989; 22(11–12):1249–1256. doi: [10.1016/0021-9290\(89\)90227-3](https://doi.org/10.1016/0021-9290(89)90227-3) PMID: [2625425](https://pubmed.ncbi.nlm.nih.gov/2625425/)
60. Zierath J, Woernle C. Modeling smooth contacts in elastic multibody systems. In: *Multibody Dynamics 2009, ECCOMAS Thematic Conference*. Warsaw, Poland; 2009.
61. Lehmann T, Schittkowski K, Spickenreuther T. *MIQL: A Fortran Code for Convex Mixed-Integer Quadratic Programming—User's Guide*. Department of Computer Science, University of Bayreuth; 2009.
62. Cappozzo A, Catani F, Della Croce UD, Leardini A. Position and orientation in space of bones during movement: Anatomical frame definition and determination. *Clinical Biomechanics*. 1995; 10(4):171–178. doi: [10.1016/0268-0033\(95\)91394-T](https://doi.org/10.1016/0268-0033(95)91394-T) PMID: [11415549](https://pubmed.ncbi.nlm.nih.gov/11415549/)
63. Lu TW, O'Connor JJ. Bone position estimation from skin marker co-ordinates using global optimisation with joint constraints. *Journal of Biomechanics*. 1999; 32(2):129–134. doi: [10.1016/S0021-9290\(98\)00158-4](https://doi.org/10.1016/S0021-9290(98)00158-4) PMID: [10052917](https://pubmed.ncbi.nlm.nih.gov/10052917/)
64. Leardini A, Chiari L, Della Croce U, Cappozzo A. Human movement analysis using stereophotogrammetry. Part 3. Soft tissue artifact assessment and compensation. *Gait and Posture*. 2005; 21(2):212–225.
65. Bauer R, Kerschbaumer F, Poisel S. *Orthopädische Operationslehre in drei Bänden, Band 2: Becken und untere Extremität*. Stuttgart: Thieme; 1994.
66. Wu G, Cavanagh PR. ISB Recommendations for Standardization in the Reporting of Kinematic Data. *Journal of Biomechanics*. 1995; 28(10):1257–1260. doi: [10.1016/0021-9290\(95\)00017-C](https://doi.org/10.1016/0021-9290(95)00017-C) PMID: [8550644](https://pubmed.ncbi.nlm.nih.gov/8550644/)
67. Bergmann G, Gandini R, Ruder H. Averaging of strongly varying signals. *Biomedical Engineering*. 2001; 46(6):168–171. doi: [10.1515/bmte.2001.46.6.168](https://doi.org/10.1515/bmte.2001.46.6.168) PMID: [11458769](https://pubmed.ncbi.nlm.nih.gov/11458769/)
68. Martelli S, Taddei F, Cappello A, van Sint Jan S, Leardini A, Viceconti M. Effect of sub-optimal neuro-motor control on the hip joint load during level walking. *Journal of Biomechanics*. 2011; 44(9):1716–1721. doi: [10.1016/j.jbiomech.2011.03.039](https://doi.org/10.1016/j.jbiomech.2011.03.039) PMID: [21497815](https://pubmed.ncbi.nlm.nih.gov/21497815/)
69. Bishop NE, Hothan A, Morlock MM. High friction moments in large hard-on-hard hip replacement bearings in conditions of poor lubrication. *Journal of Orthopaedic Research*. 2013; 31(5):807–813. doi: [10.1002/jor.22255](https://doi.org/10.1002/jor.22255) PMID: [23239536](https://pubmed.ncbi.nlm.nih.gov/23239536/)
70. van Arkel RJ, Modenese L, Phillips ATM, Jeffers JRT. Hip Abduction Can Prevent Posterior Edge Loading of Hip Replacements. *Journal of Orthopaedic Research*. 2013; 31(8):1172–1179. doi: [10.1002/jor.22364](https://doi.org/10.1002/jor.22364) PMID: [23575923](https://pubmed.ncbi.nlm.nih.gov/23575923/)
71. Nicholas RM, Orr JF, Mollan RA, Calderwood JW, Nixon JR, Watson P. Dislocation of total hip replacements. A comparative study of standard, long posterior wall and augmented acetabular components. *Journal of Bone and Joint Surgery—Series B*. 1990; 72(3):418–422.
72. Yoshimine F. The safe-zones for combined cup and neck anteversions that fulfill the essential range of motion and their optimum combination in total hip replacements. *Journal of Biomechanics*. 2006; 39(7):1315–1323. doi: [10.1016/j.jbiomech.2005.03.008](https://doi.org/10.1016/j.jbiomech.2005.03.008) PMID: [15894324](https://pubmed.ncbi.nlm.nih.gov/15894324/)



73. Brand RA, Pedersen DR, Davy DT, Kotzar GM, Heiple KG, Goldberg VM. Comparison of hip force calculations and measurements in the same patient. *Journal of Arthroplasty*. 1994; 9(1):45–51. doi: [10.1016/0883-5403\(94\)90136-8](https://doi.org/10.1016/0883-5403(94)90136-8) PMID: [8163975](https://pubmed.ncbi.nlm.nih.gov/8163975/)
74. Elkins JM, Callaghan JJ, Brown TD. Stability and trunnion wear potential in large-diameter metal-on-metal total hips: A finite element analysis. *Clinical Orthopaedics and Related Research*. 2014; 472(2):529–542. doi: [10.1007/s11999-013-3244-8](https://doi.org/10.1007/s11999-013-3244-8) PMID: [24218160](https://pubmed.ncbi.nlm.nih.gov/24218160/)
75. Elkins JM, Callaghan JJ, Brown TD. The 'Landing Zone' for Wear and Stability in Total Hip Arthroplasty Is Smaller Than We Thought: A Computational Analysis. *Clinical Orthopaedics and Related Research*. 2015; 473(2):441–452.
76. Krenn R, Schäfer B. Limitations of hardware-in-the-loop simulations of space robotics dynamics using industrial robots. In: *Proceedings of the 5th International Symposium on Artificial Intelligence, Robotics and Automation in Space*. Noordwijk, The Netherlands; 1999. p. 681–686.
77. Boge T, Ma O. Using advanced industrial robotics for spacecraft rendezvous and docking simulation. In: *International Conference on Robotics and Automation 2011 Communications*. Shanghai, China; 2011.
78. Modenese L, Gopalakrishnan A, Phillips AT. Application of a falsification strategy to a musculoskeletal model of the lower limb and accuracy of the predicted hip contact force vector. *Journal of Biomechanics*. 2013; 46(6):1193–1200. doi: [10.1016/j.jbiomech.2012.11.045](https://doi.org/10.1016/j.jbiomech.2012.11.045) PMID: [23427941](https://pubmed.ncbi.nlm.nih.gov/23427941/)
79. Vrahas MS, Brand RA, Brown TD, Andrews JG. Contribution of passive tissues to the intersegmental moments at the hip. *Journal of Biomechanics*. 1990; 23(4):357–362. doi: [10.1016/0021-9290\(90\)90065-B](https://doi.org/10.1016/0021-9290(90)90065-B) PMID: [2335535](https://pubmed.ncbi.nlm.nih.gov/2335535/)
80. Lamontagne M, Beaulieu ML, Varin D, Beulé PE. Lower-limb joint mechanics after total hip arthroplasty during sitting and standing tasks. *Journal of Orthopaedic Research*. 2012; 30(10):1611–1617. doi: [10.1002/jor.22127](https://doi.org/10.1002/jor.22127) PMID: [22508467](https://pubmed.ncbi.nlm.nih.gov/22508467/)
81. Pedersen DR, Brand RA, Cheng C, Arora JS. Direct comparison of muscle force predictions using linear and nonlinear programming. *Journal of Biomechanical Engineering*. 1987; 109(3):192–199. doi: [10.1115/1.3138669](https://doi.org/10.1115/1.3138669) PMID: [3657106](https://pubmed.ncbi.nlm.nih.gov/3657106/)
82. Modenese L, Phillips AT, Bull AM. An open source lower limb model: Hip joint validation. *Journal of Biomechanics*. 2011; 44(12):2185–2193. doi: [10.1016/j.jbiomech.2011.06.019](https://doi.org/10.1016/j.jbiomech.2011.06.019) PMID: [21742331](https://pubmed.ncbi.nlm.nih.gov/21742331/)
83. Raikova R. About weight factors in the non-linear objective functions used for solving indeterminate problems in biomechanics. *Journal of Biomechanics*. 1999; 32(7):689–694. doi: [10.1016/S0021-9290\(99\)00037-8](https://doi.org/10.1016/S0021-9290(99)00037-8) PMID: [10400356](https://pubmed.ncbi.nlm.nih.gov/10400356/)
84. Herzog W, Binding P. Cocontraction of Pairs of Antagonistic Muscles—Analytical Solution for Planar Static Nonlinear Optimization Approaches. *Mathematical Biosciences*. 1993; 118(1):83–95. doi: [10.1016/0025-5564\(93\)90034-8](https://doi.org/10.1016/0025-5564(93)90034-8) PMID: [8260761](https://pubmed.ncbi.nlm.nih.gov/8260761/)
85. Patriarco AG, Mann RW, Simon SR, Mansour JM. An evaluation of the approaches of optimization models in the prediction of muscle forces during human gait. *Journal of Biomechanics*. 1981; 14(8):513–525. doi: [10.1016/0021-9290\(81\)90001-4](https://doi.org/10.1016/0021-9290(81)90001-4) PMID: [7276011](https://pubmed.ncbi.nlm.nih.gov/7276011/)
86. Carbone V, van der Krogt MM, Koopman HF, Verdonschot N. Sensitivity of subject-specific models to errors in musculo-skeletal geometry. *Journal of Biomechanics*. 2012; 45(14):2476–2480. doi: [10.1016/j.jbiomech.2012.06.026](https://doi.org/10.1016/j.jbiomech.2012.06.026) PMID: [22867762](https://pubmed.ncbi.nlm.nih.gov/22867762/)
87. Raikova RT, Prilutsky BI. Sensitivity of predicted muscle forces to parameters of the optimization-based human leg model revealed by analytical and numerical analyses. *Journal of Biomechanics*. 2001; 34(10):1243–1255. doi: [10.1016/S0021-9290\(01\)00097-5](https://doi.org/10.1016/S0021-9290(01)00097-5) PMID: [11522304](https://pubmed.ncbi.nlm.nih.gov/11522304/)
88. Collins JJ. The redundant nature of locomotor optimization laws. *Journal of Biomechanics*. 1995; 28(3):251–267. doi: [10.1016/0021-9290\(94\)00072-C](https://doi.org/10.1016/0021-9290(94)00072-C) PMID: [7730385](https://pubmed.ncbi.nlm.nih.gov/7730385/)
89. Hewitt J, Guilak F, Glisson R, Vail TP. Regional material properties of the human hip joint capsule ligaments. *Journal of Orthopaedic Research*. 2001; 19(3):359–364. doi: [10.1016/S0736-0266\(00\)00035-8](https://doi.org/10.1016/S0736-0266(00)00035-8) PMID: [11398846](https://pubmed.ncbi.nlm.nih.gov/11398846/)
90. Stewart KJ, Edmonds-Wilson RH, Brand RA, Brown TD. Spatial distribution of hip capsule structural and material properties. *Journal of Biomechanics*. 2002; 35(11):1491–1498. doi: [10.1016/S0021-9290\(02\)00091-X](https://doi.org/10.1016/S0021-9290(02)00091-X) PMID: [12413968](https://pubmed.ncbi.nlm.nih.gov/12413968/)
91. van Arkel RJ, Amis AA, Cobb JP, Jeffers JRT. The capsular ligaments provide more hip rotational restraint than the acetabular labrum and the ligamentum teres: An experimental study. *Bone & Joint Journal*. 2015; 97-B(4):484–491.
